# Supplementary material for: Geotemporospatial and causal inference epidemiological analysis of US survey and overview of cannabis, cannabidiol and cannabinoid genotoxicity in relation to congenital anomalies 2001–2015
Source: Springer Nature journal article supplement (doi:10.1186/s12887-021-02996-3), 2022-01-19

**Log (ETOPFA-Corrected Defect Rates) by Defect Type by Monthly Binge Alcohol Exposure, USA,  
Data: NBDPN, CDC Data 1989-1990 - 2011-2015 and NSDUH SAMHDA RDAS SAMHSA**

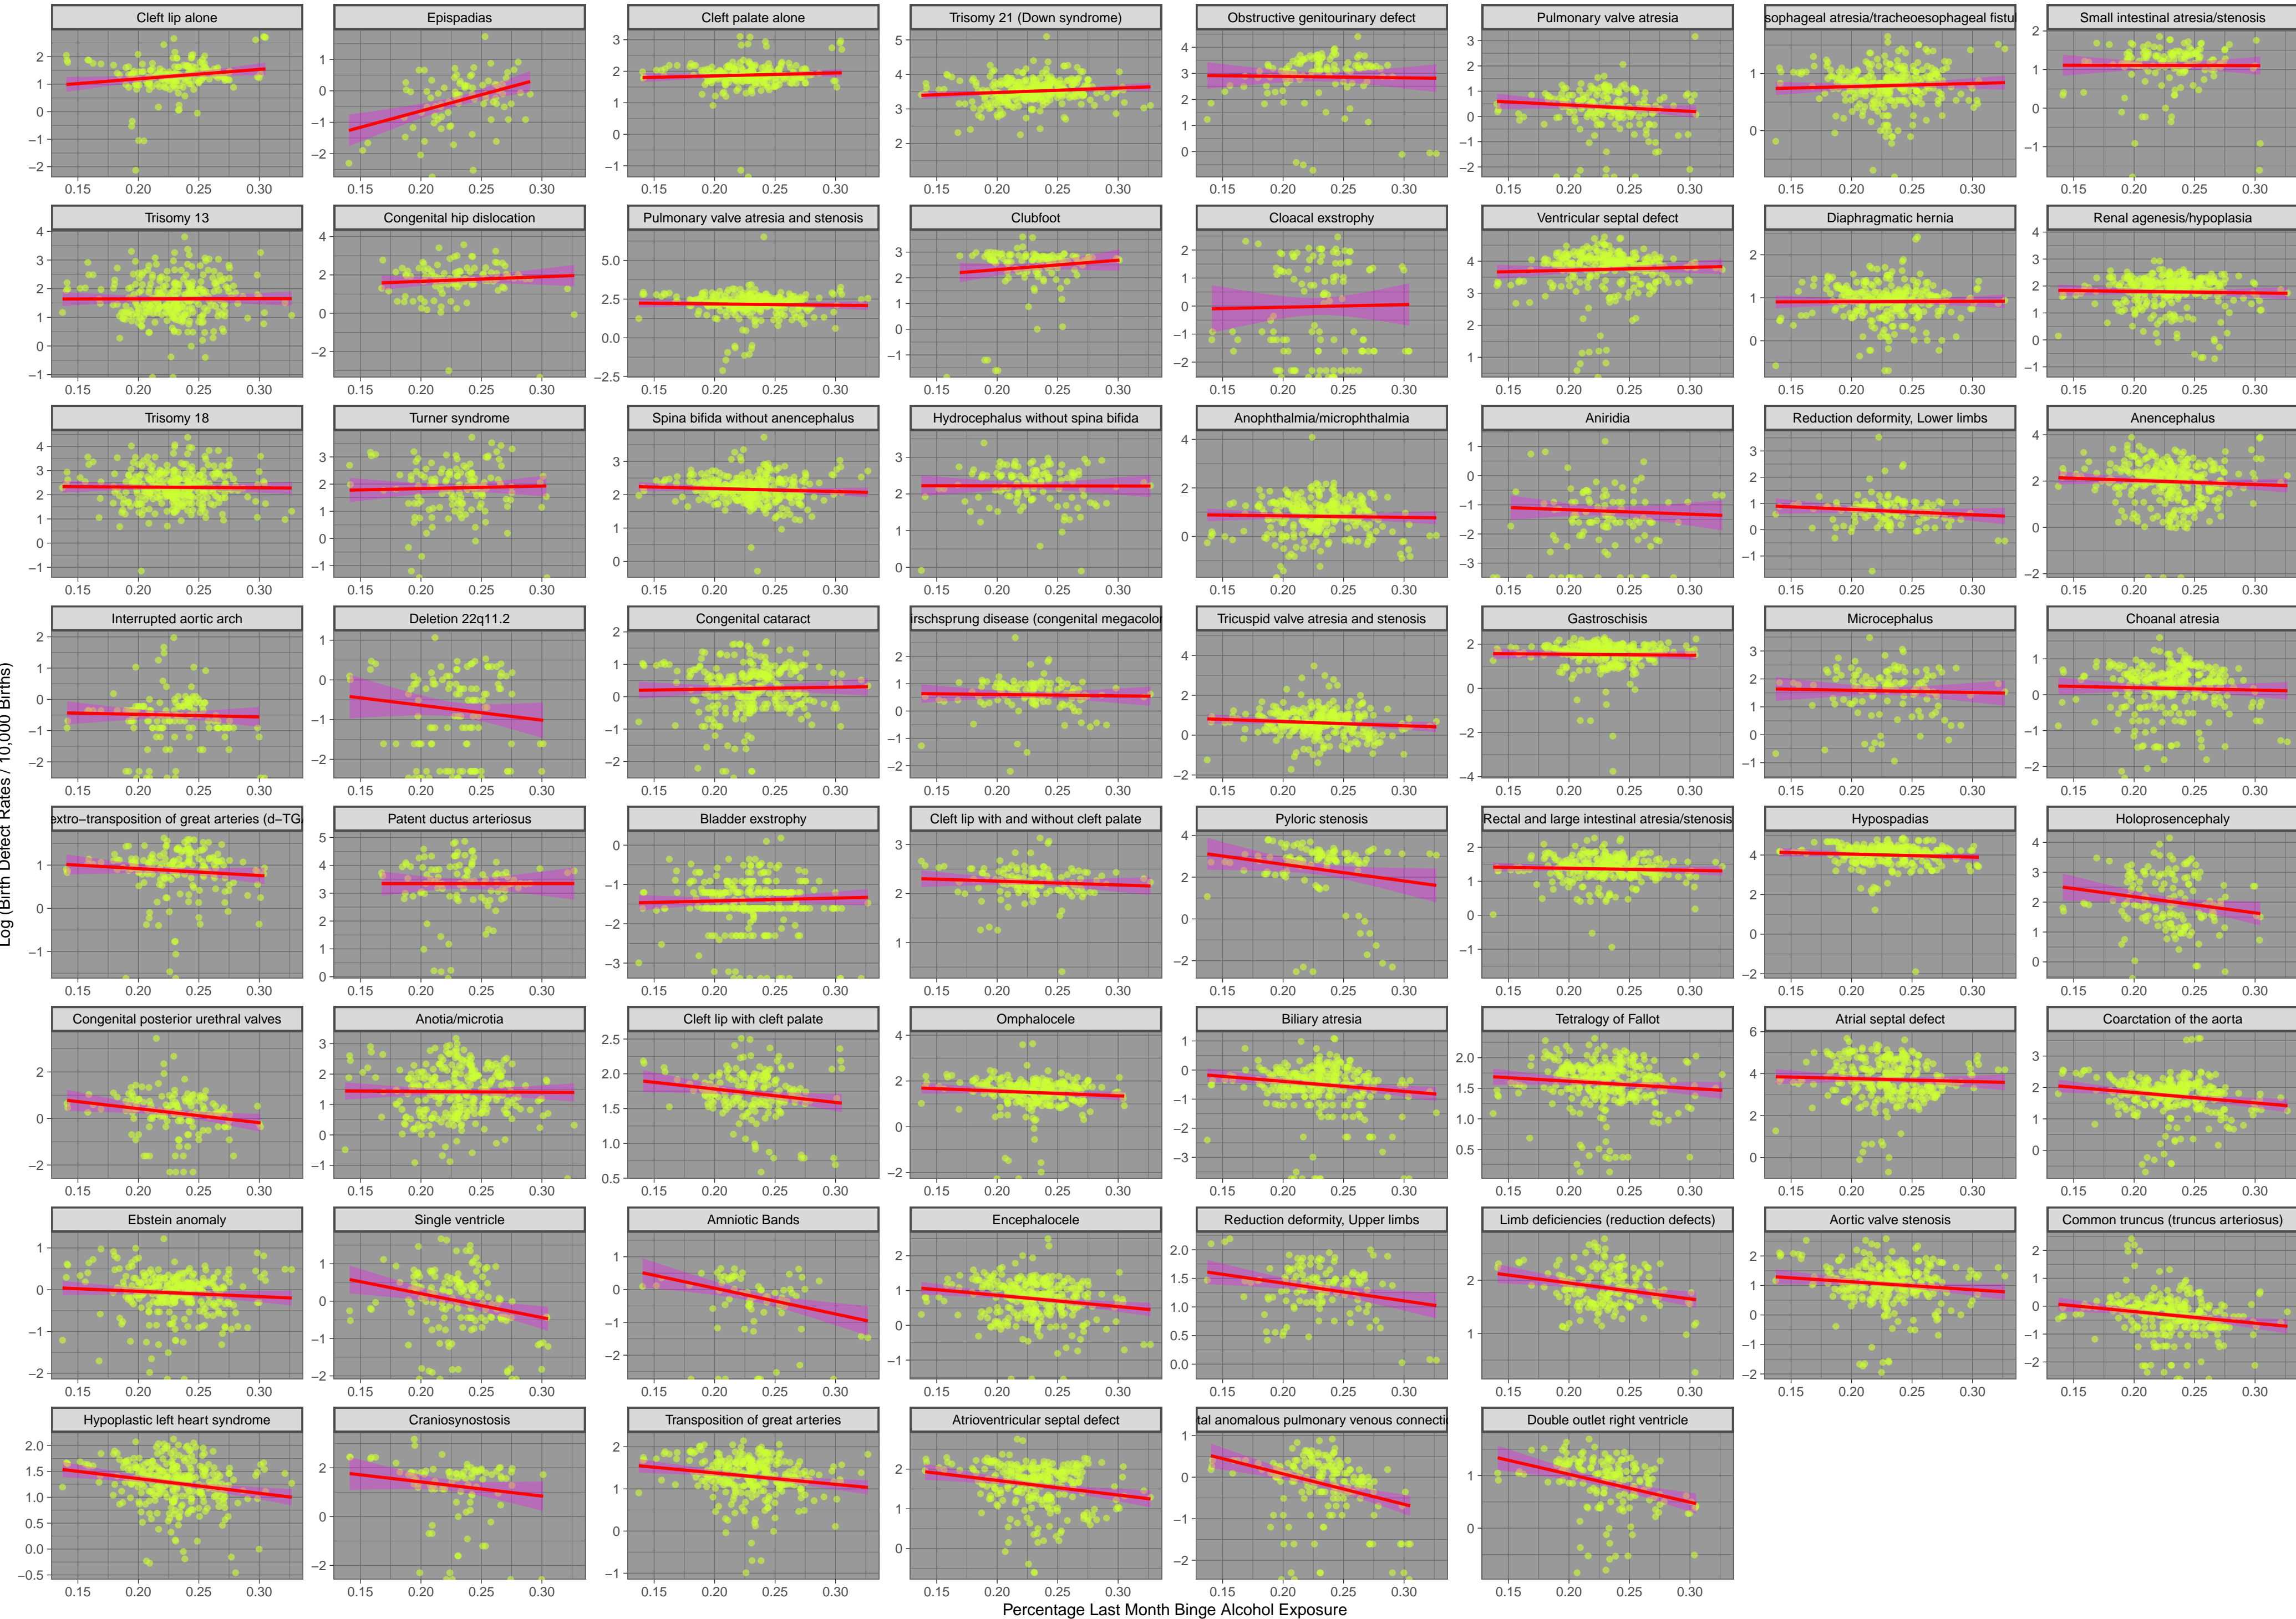

**Log (ETOPFA-Corrected Defect Rates) by Defect Type by Monthly Alcohol Exposure, USA,  
Data: NBDPN, CDC Data 1989–1990 – 2011–2015 and NSDUH SAMHSA 1999–2015 sas7bdat Datafile**

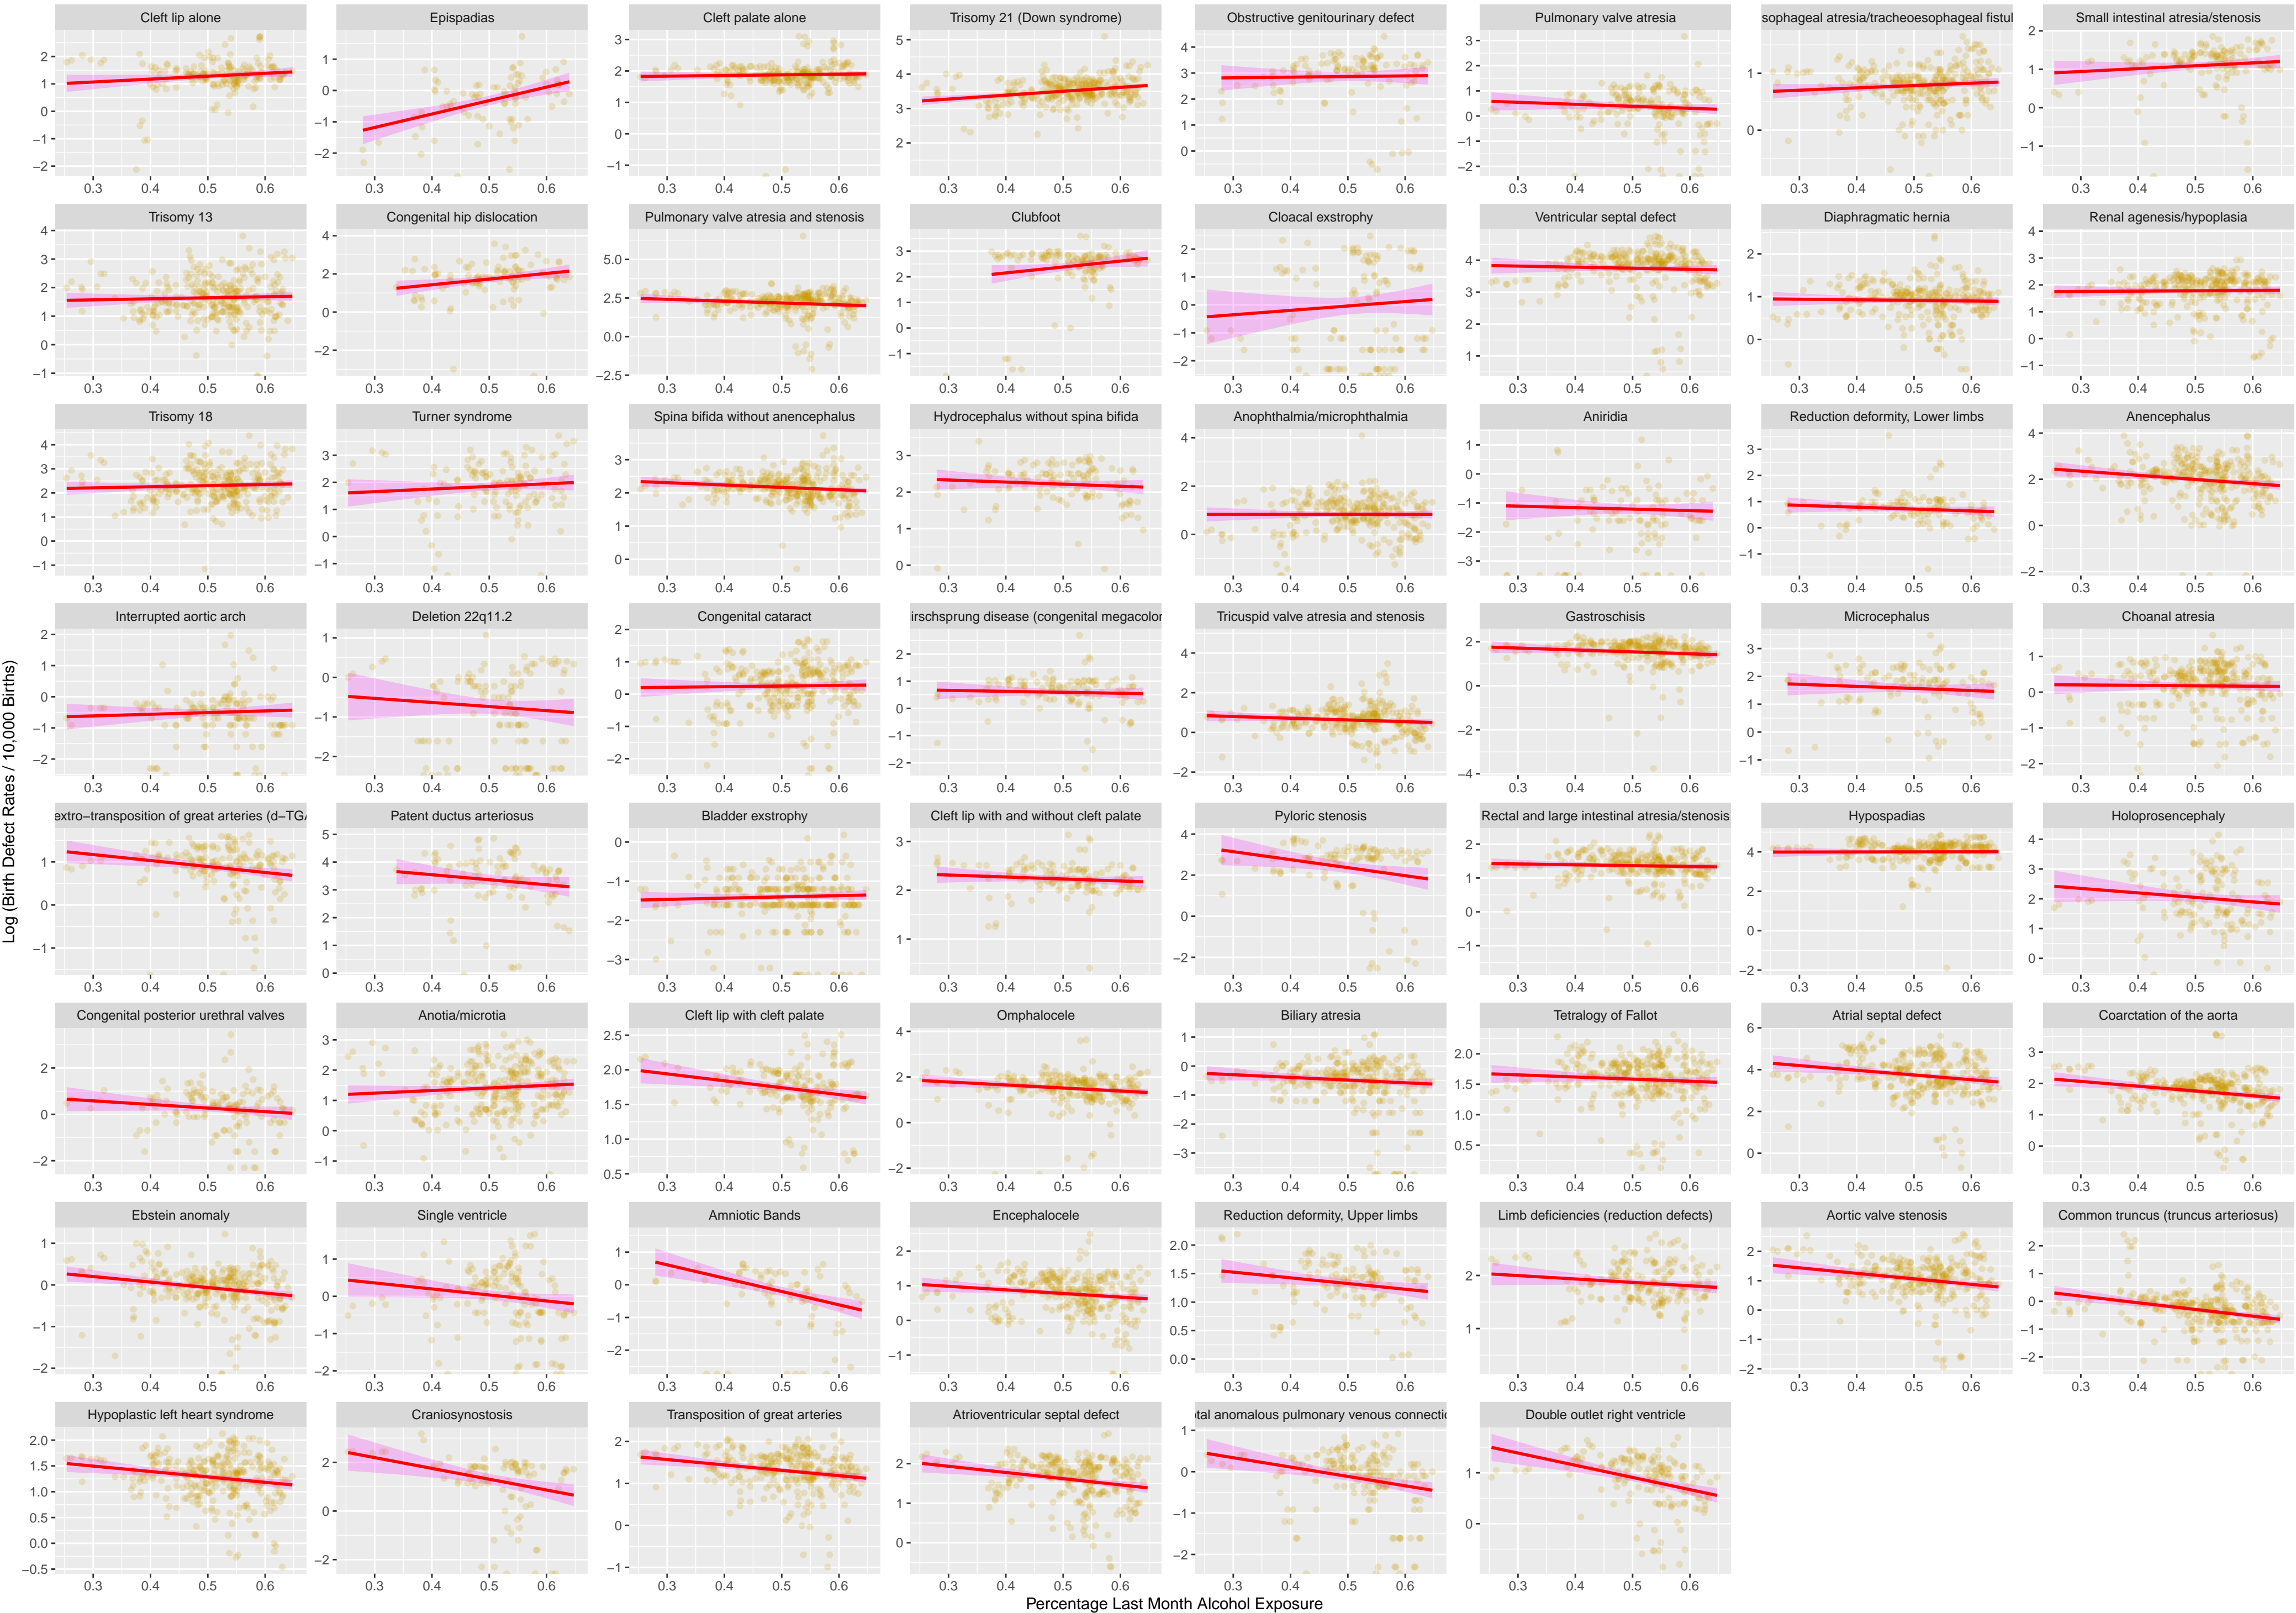

Log (Minimum E-Values) for Congenital Anomaly – Binge Alcohol Relationship

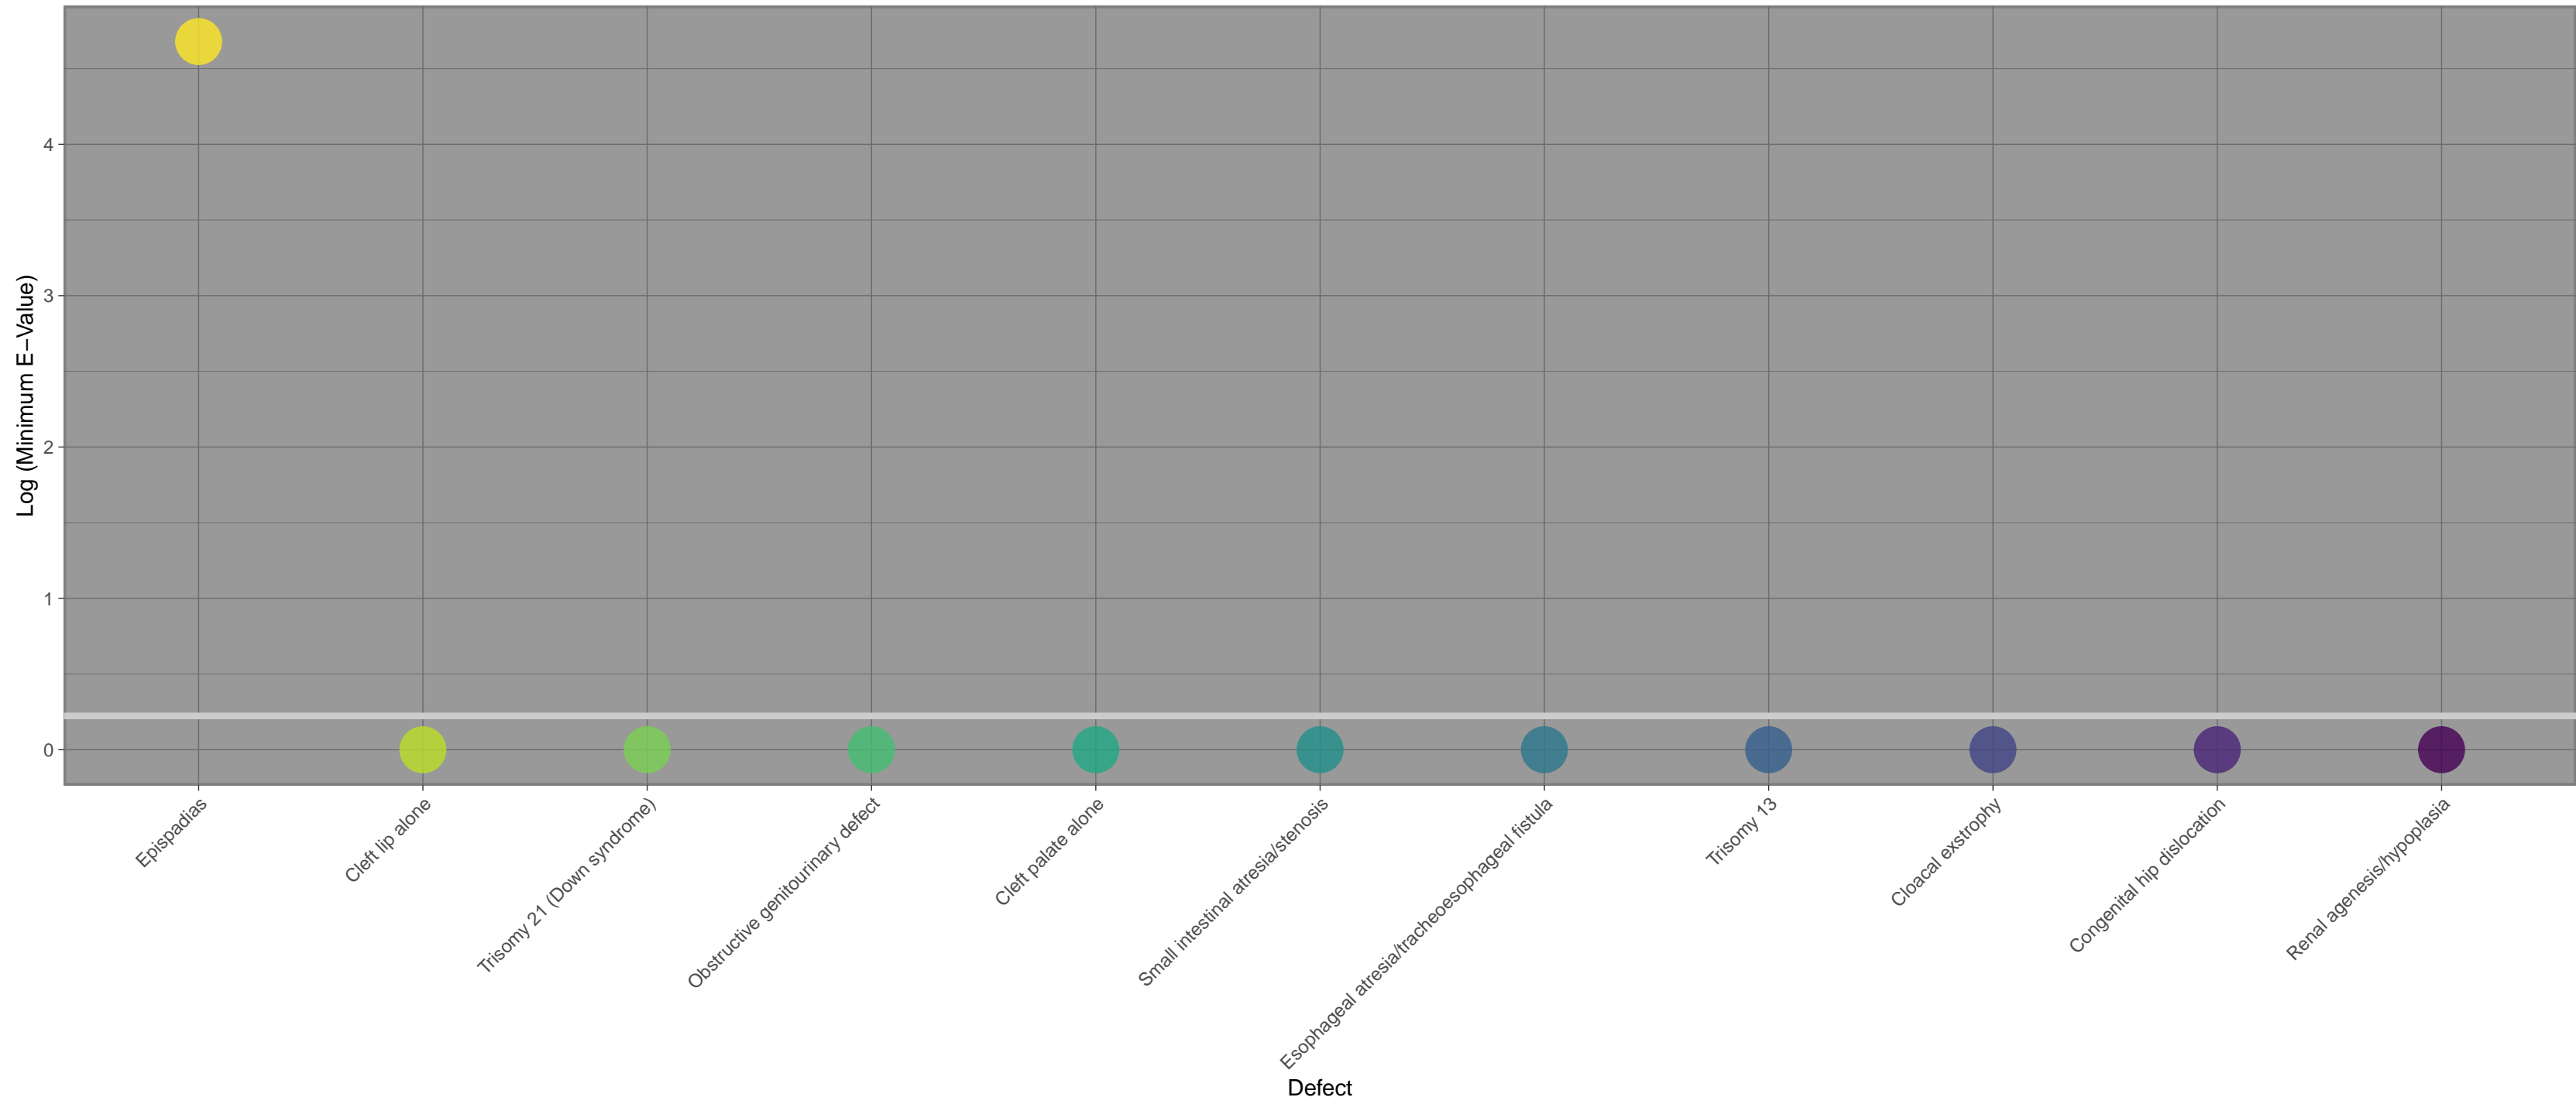

Log (Minimum E-Values) for Congenital Anomaly – Last Month Alcohol Relationship

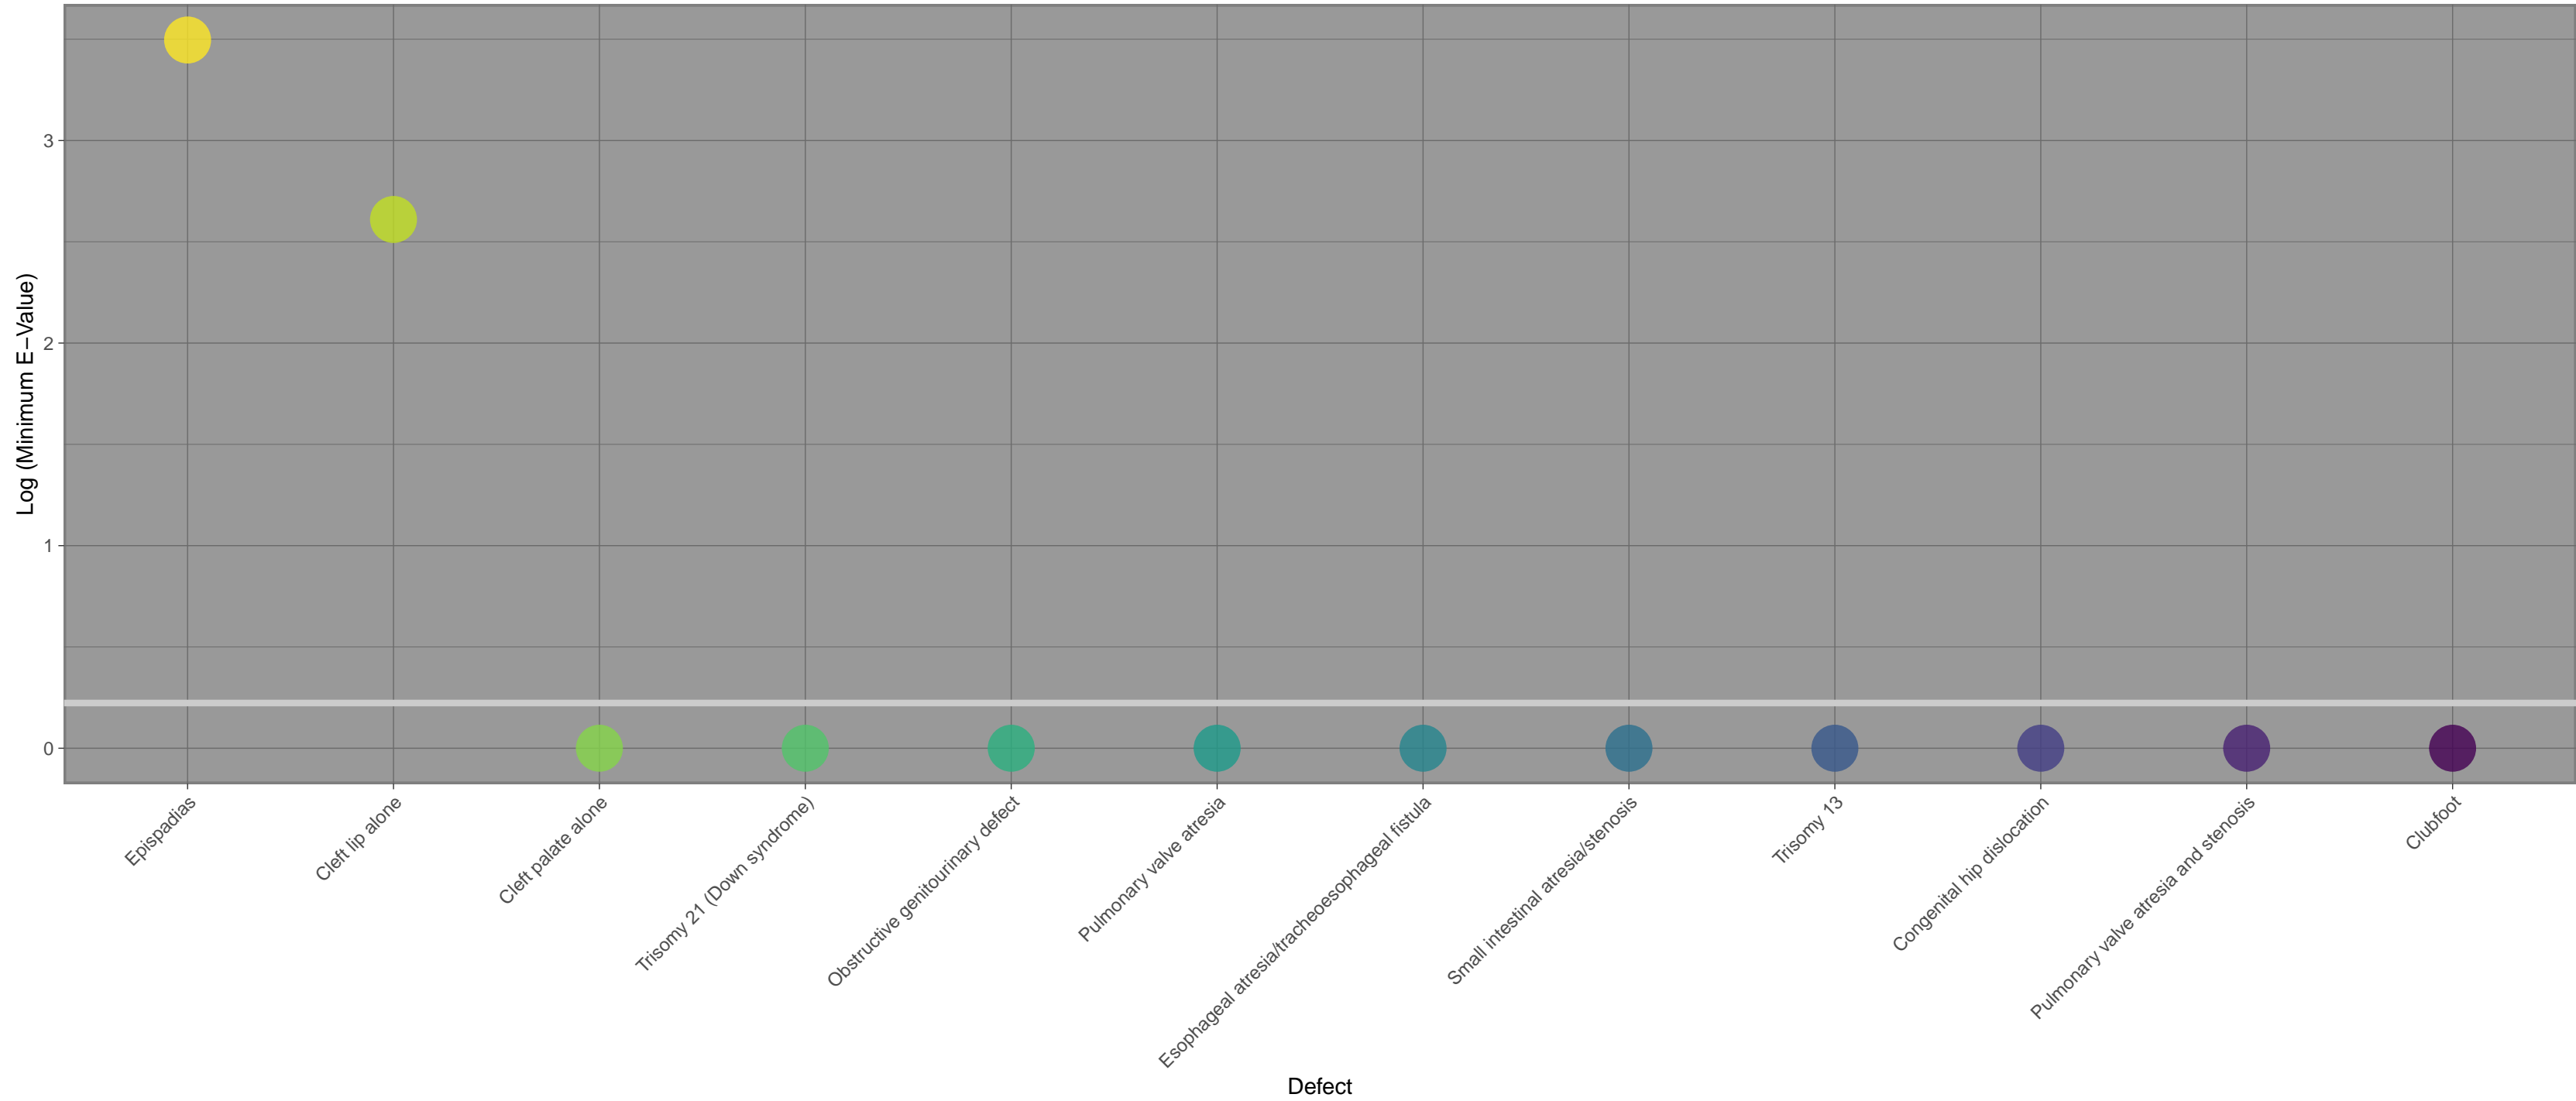

### Boxplot of Congenital Anomaly Rates by Highest v Lowest Binge Alcohol Exposure Quintiles

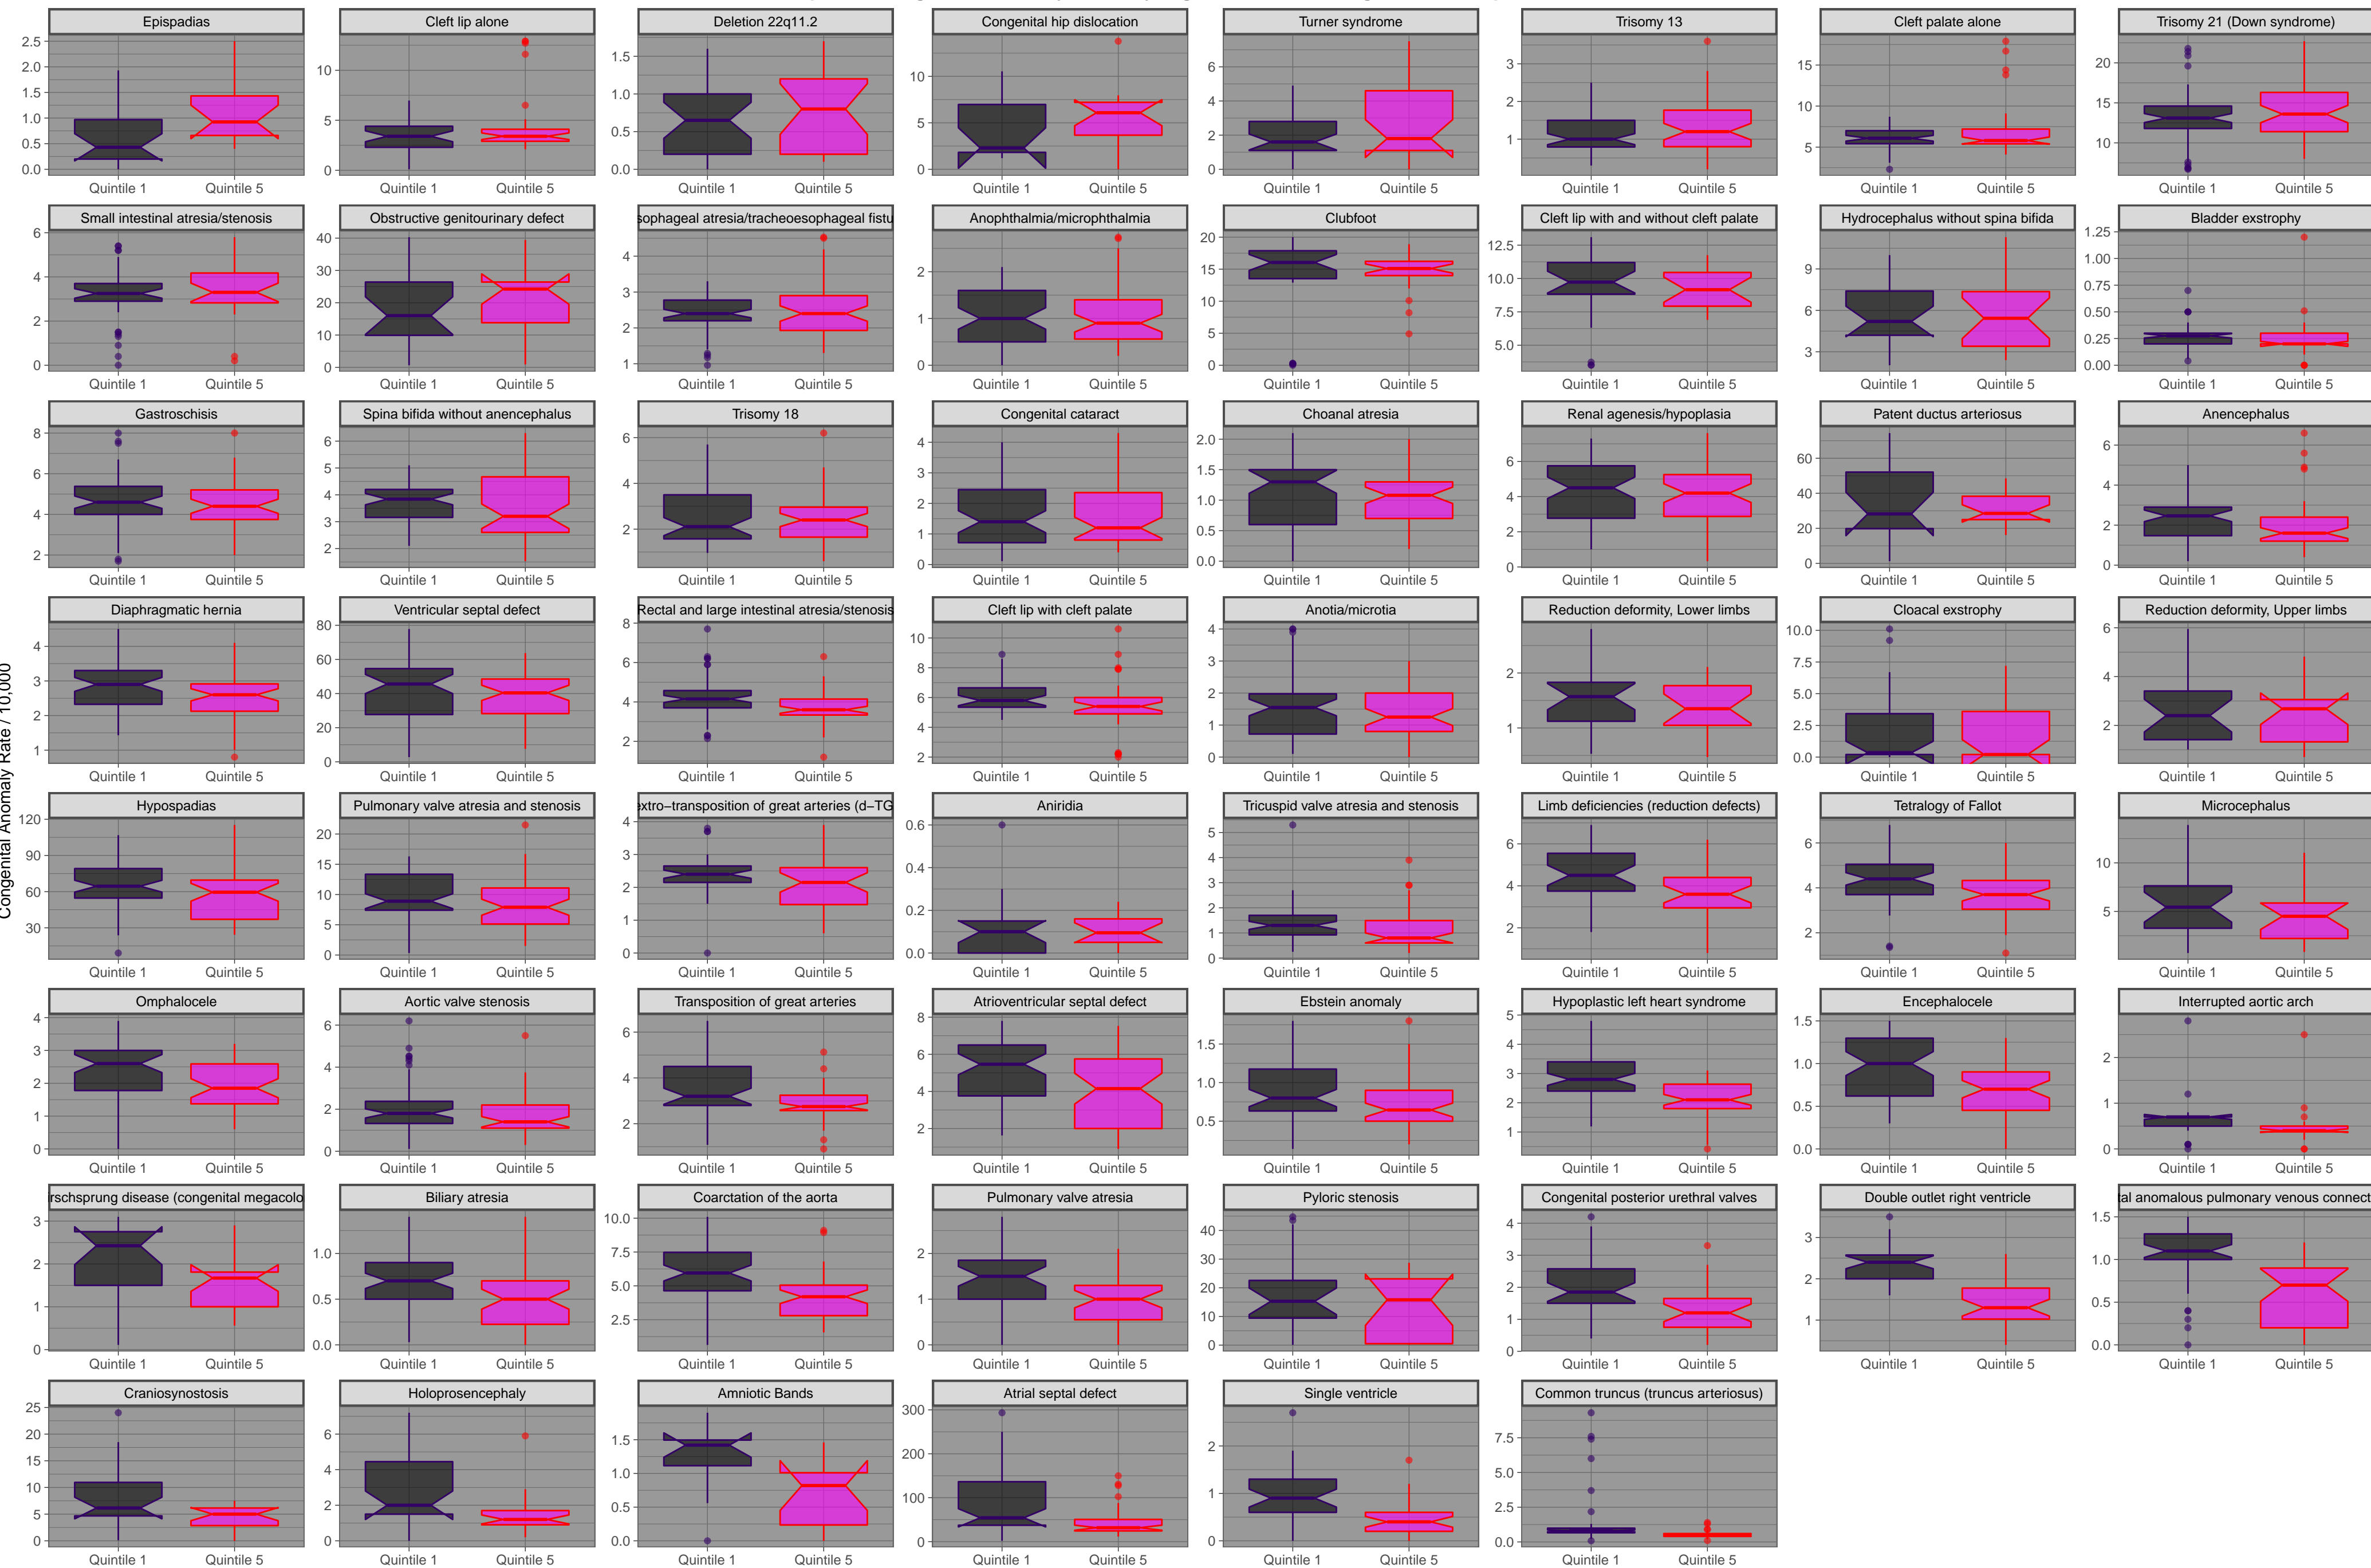

# Boxplot of Congenital Anomaly Rates by Highest v Lowest Monthly Alcohol Exposure Quintiles

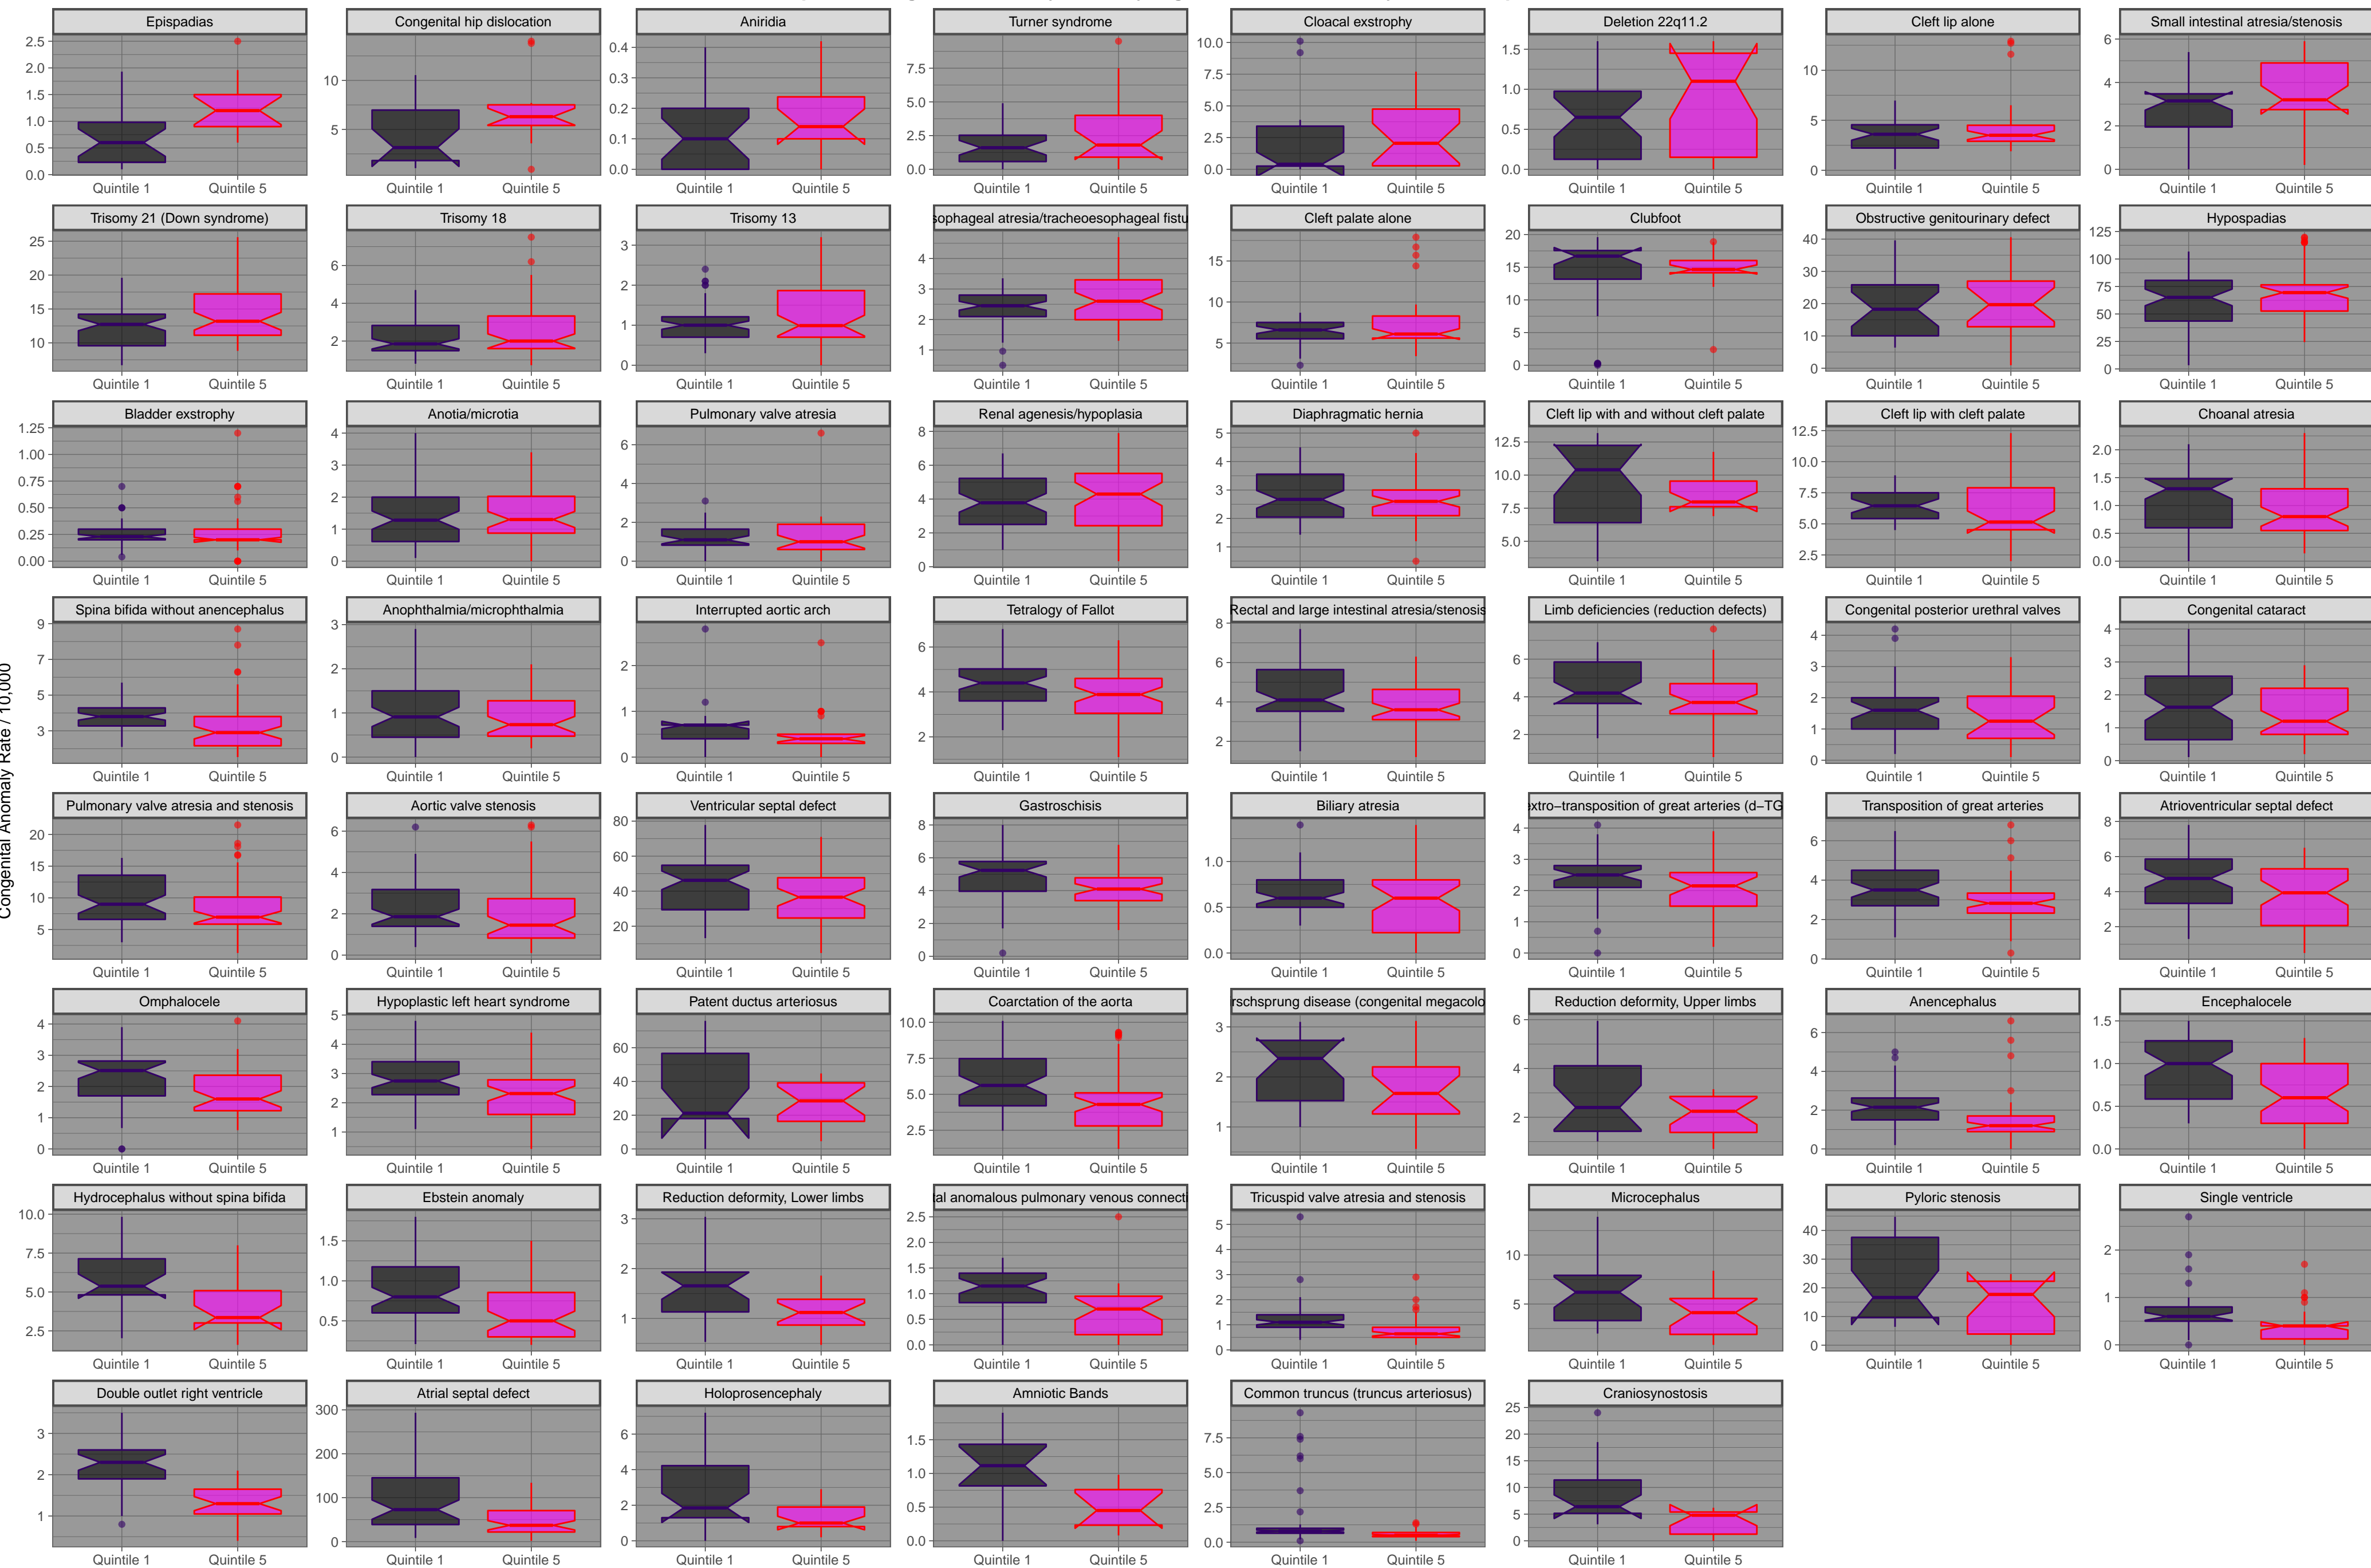

# Boxplot of Congenital Anomaly Rates by Highest v Lowest Analgesic Exposure Quintiles

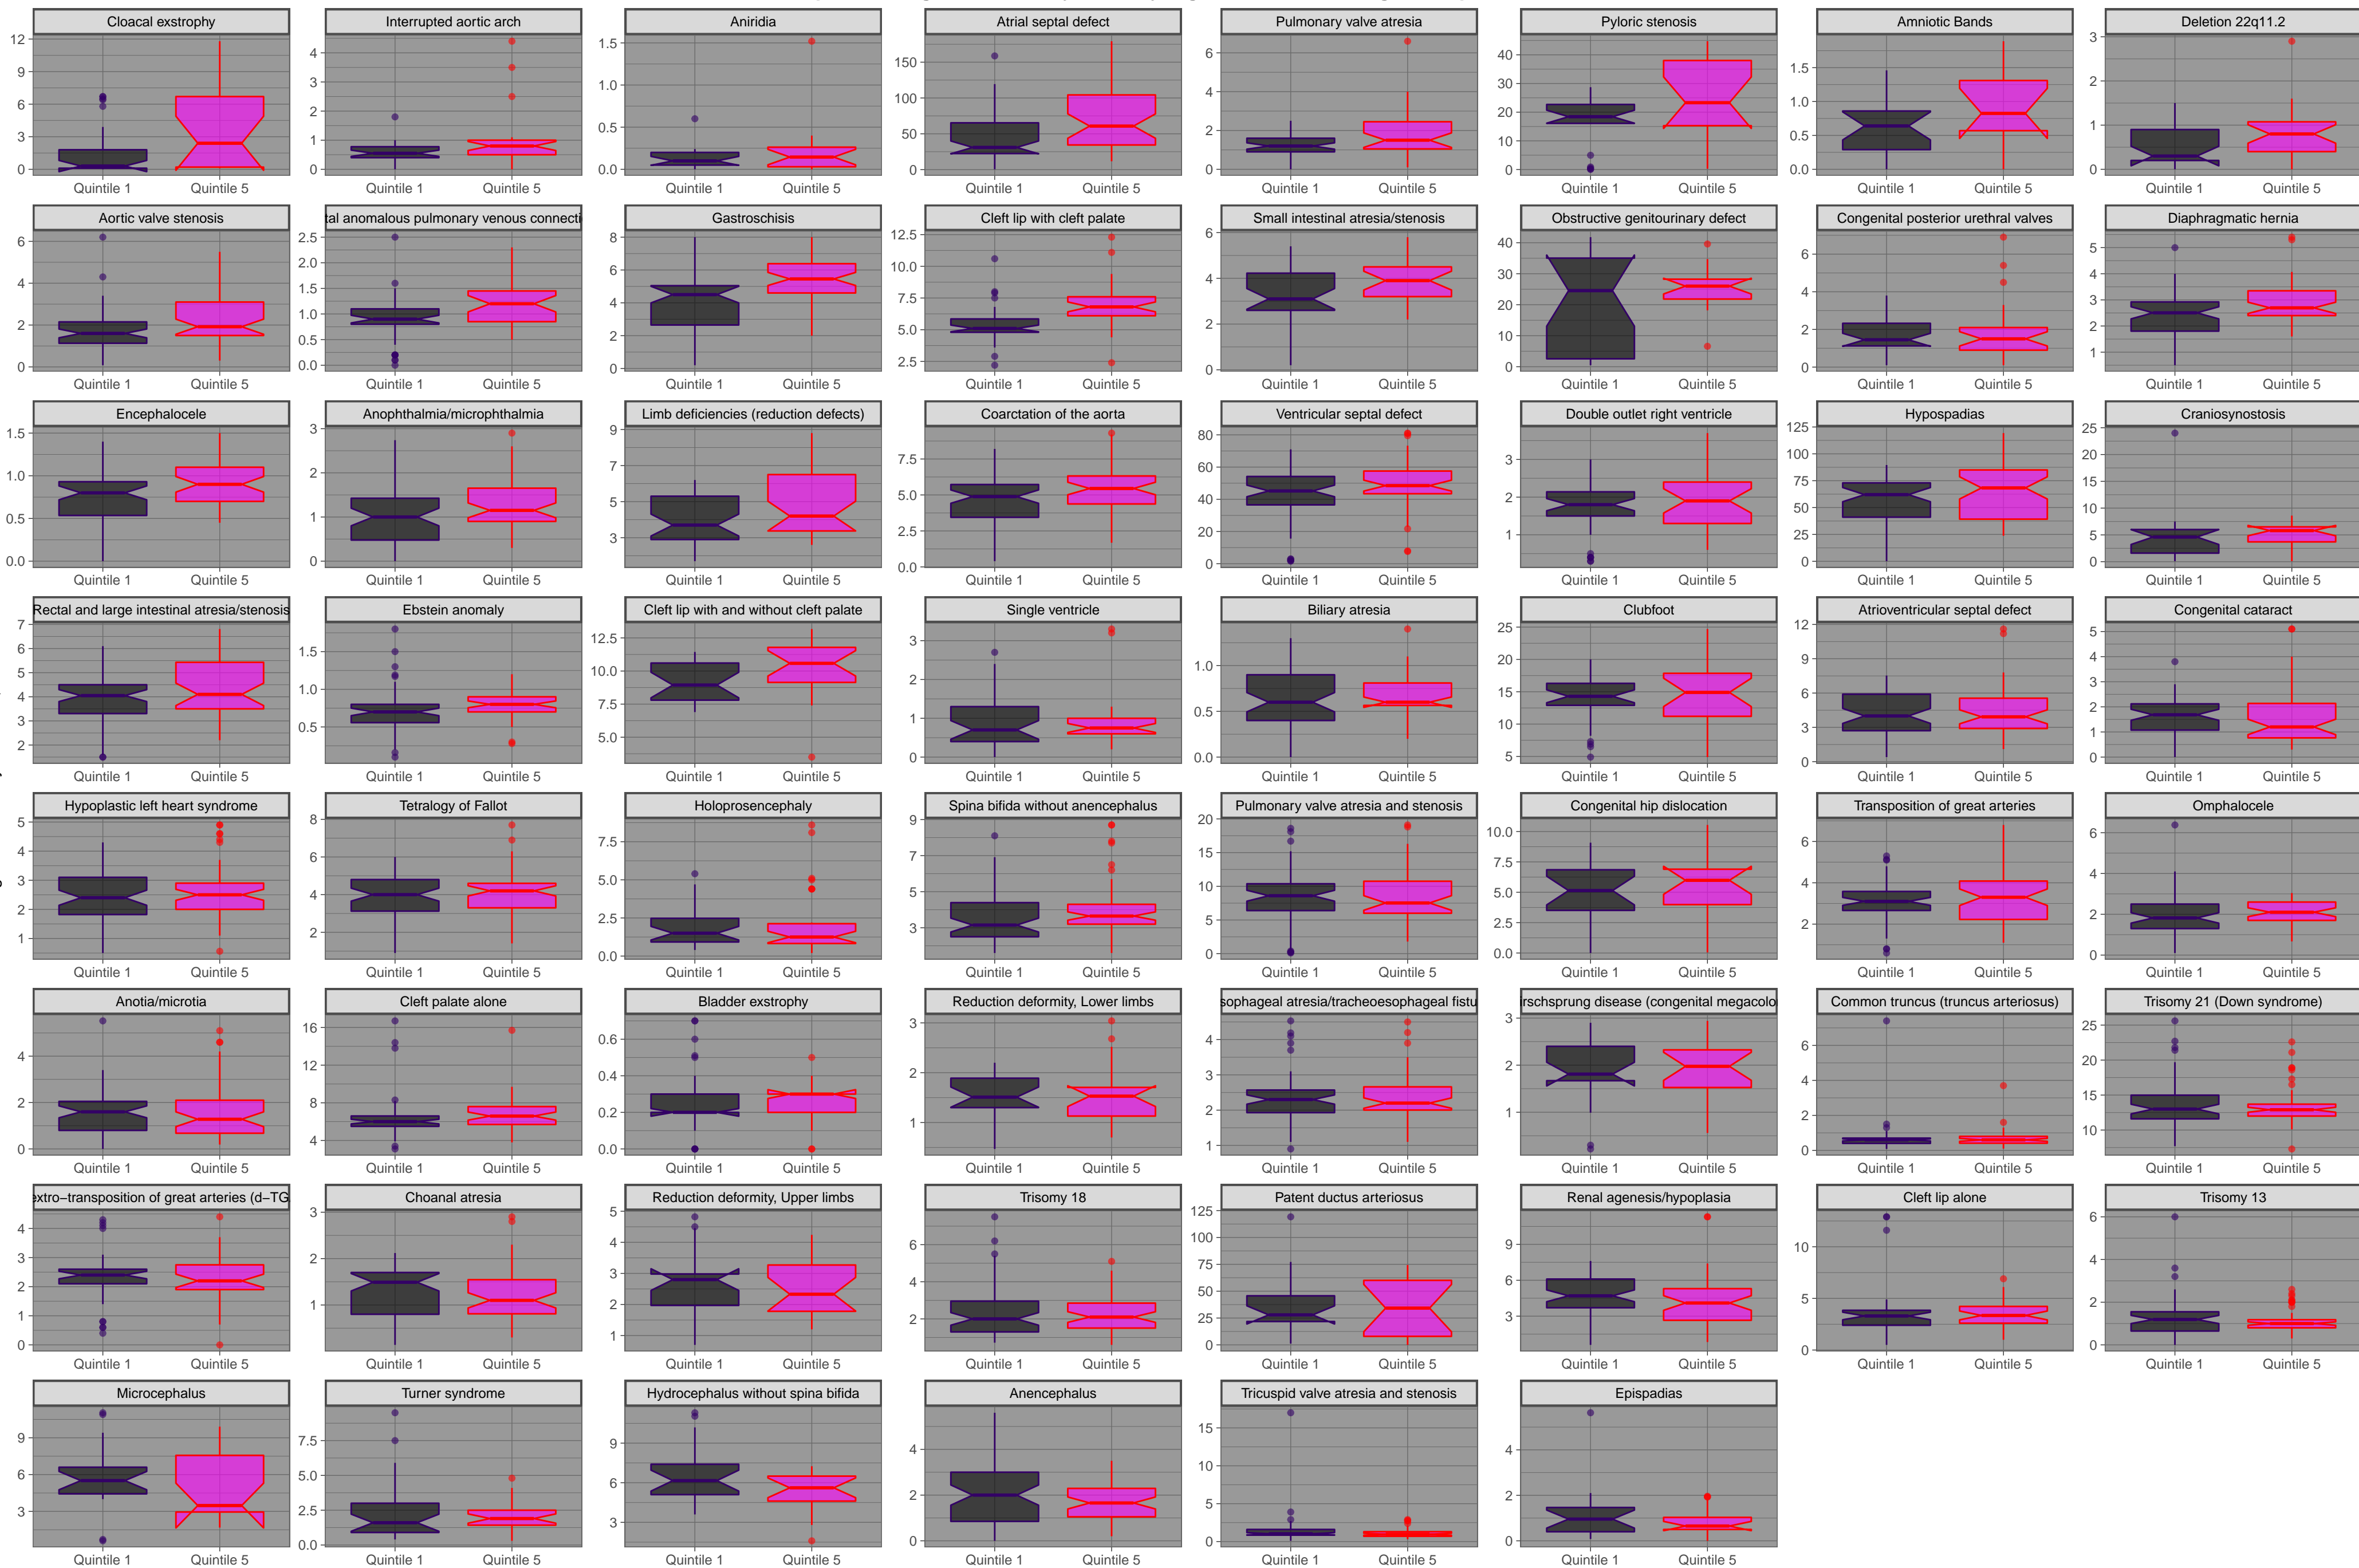

### Boxplot of Congenital Anomaly Rates by Highest v Lowest Cocaine Exposure Quintiles

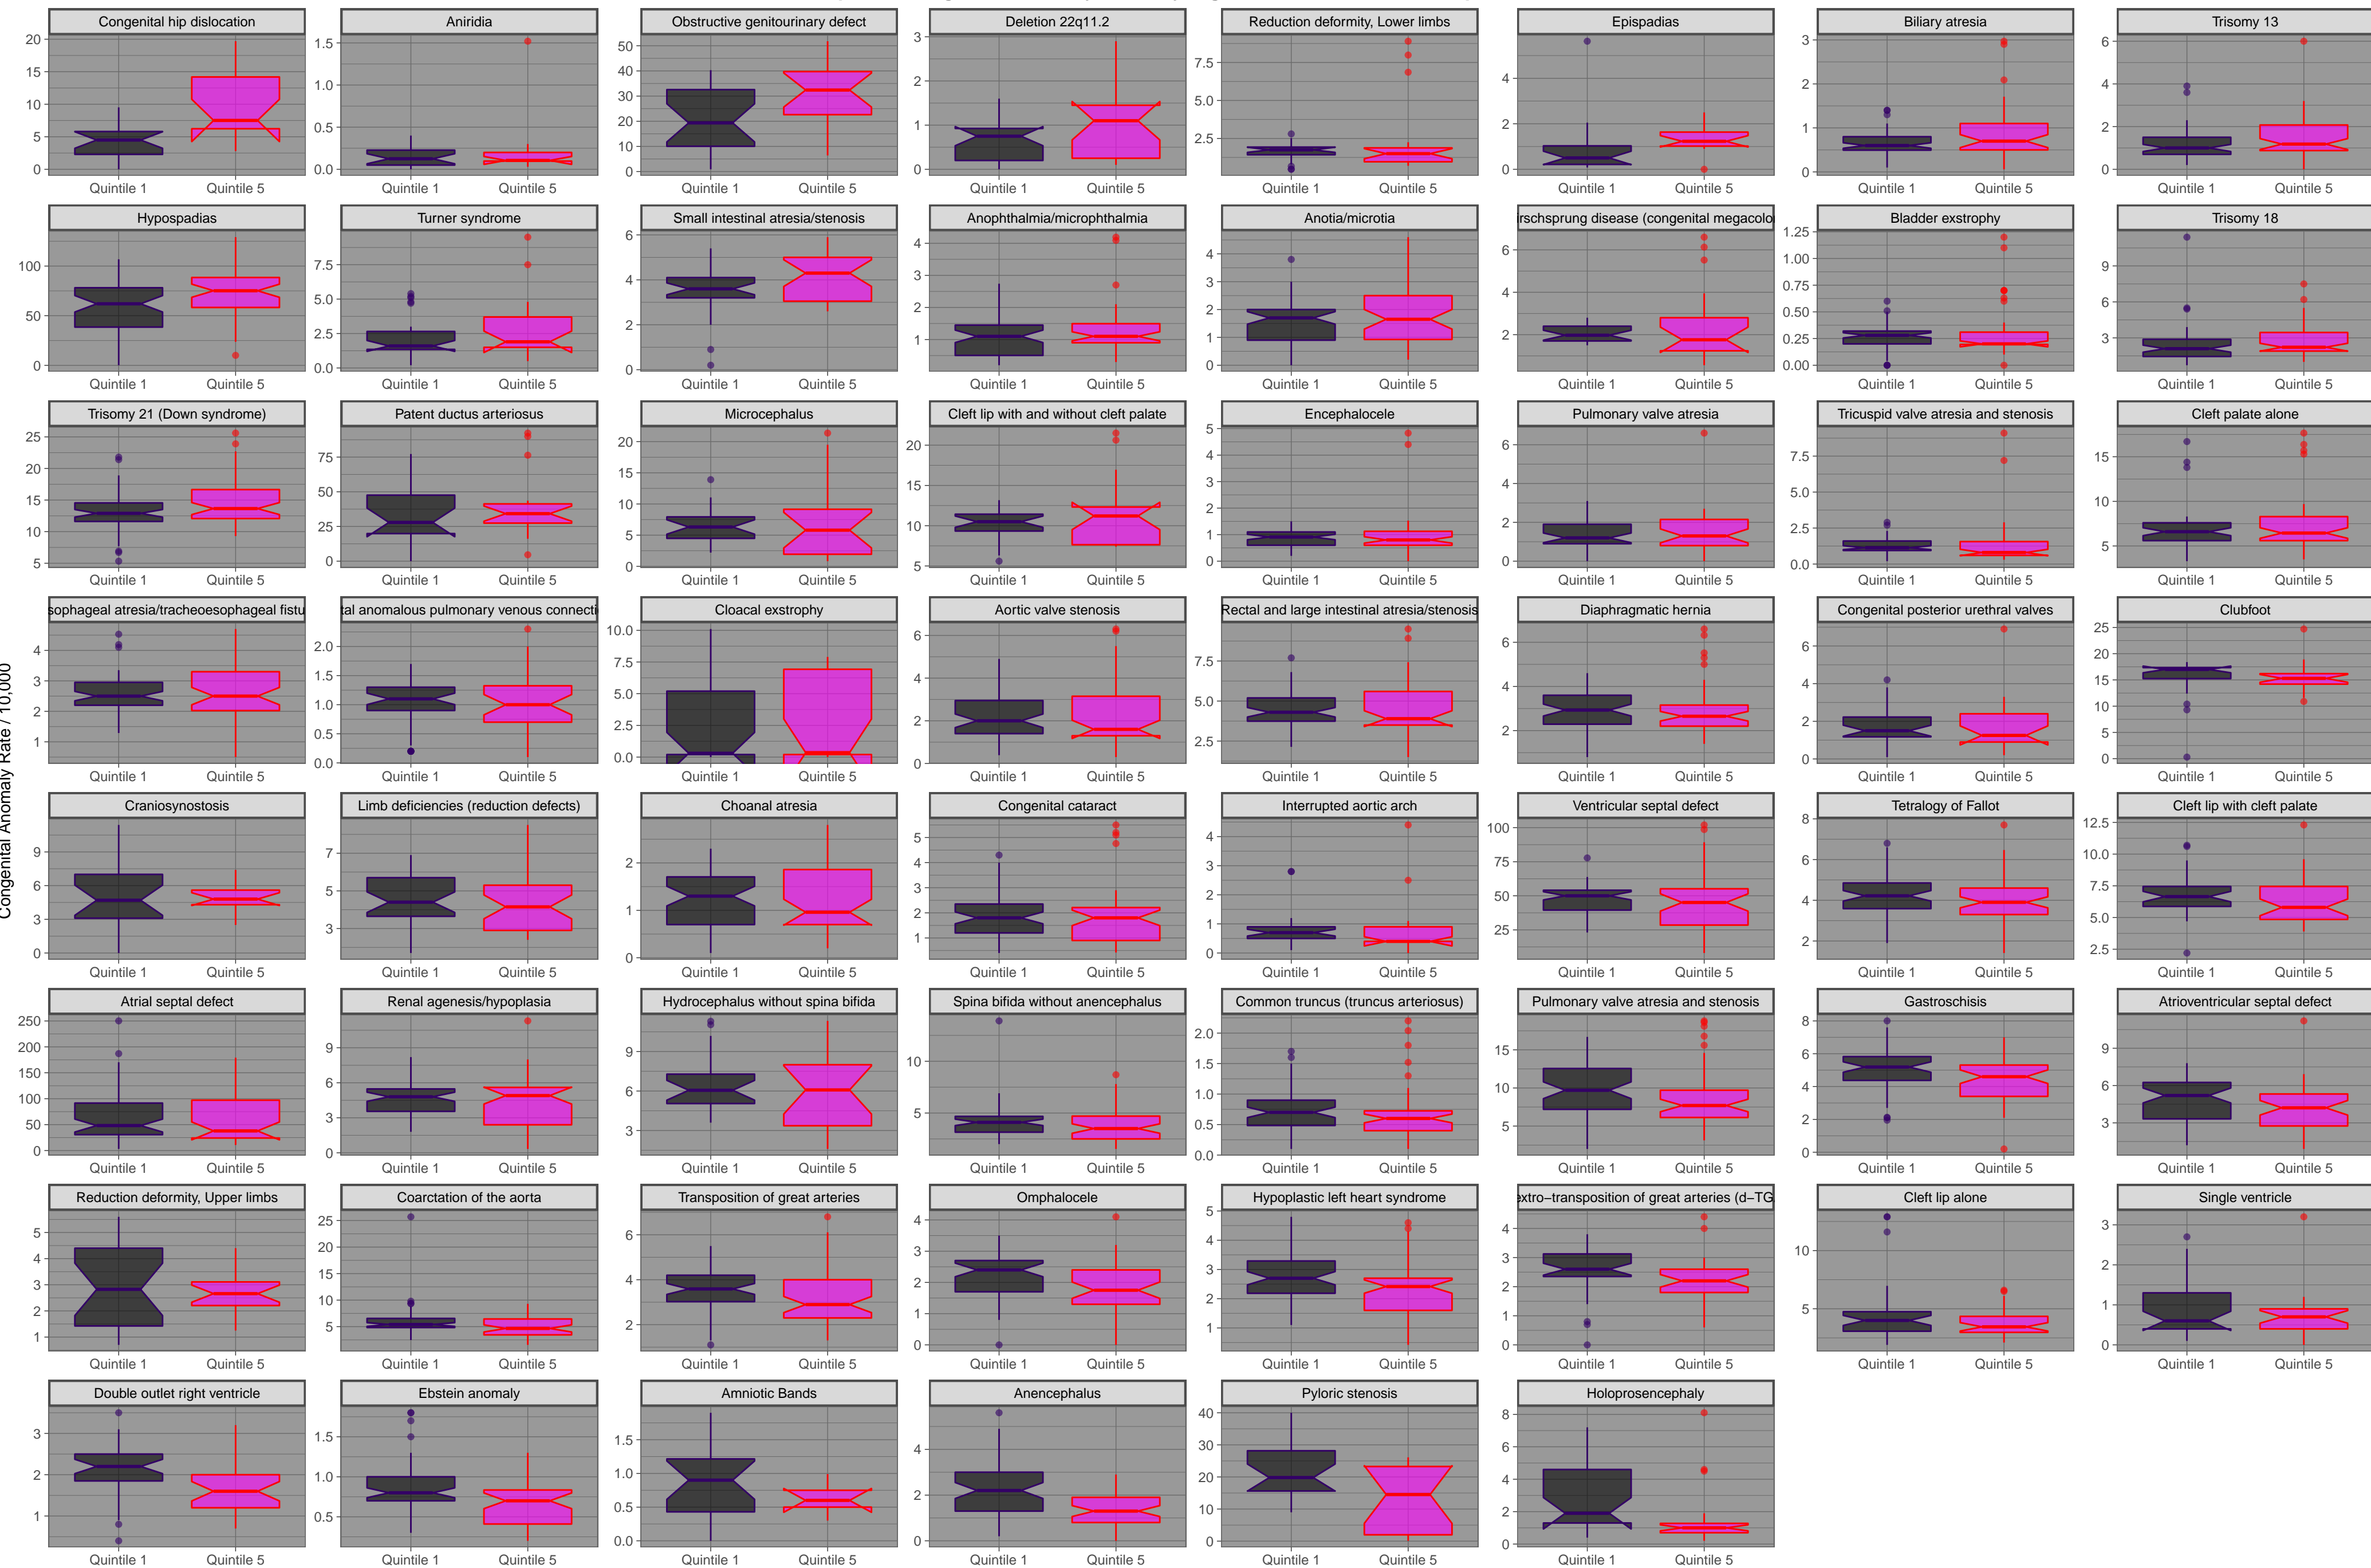



**Additional Links to US State Neighbourhood Linkage Network  
for Small intestinal atresia/stenosis**

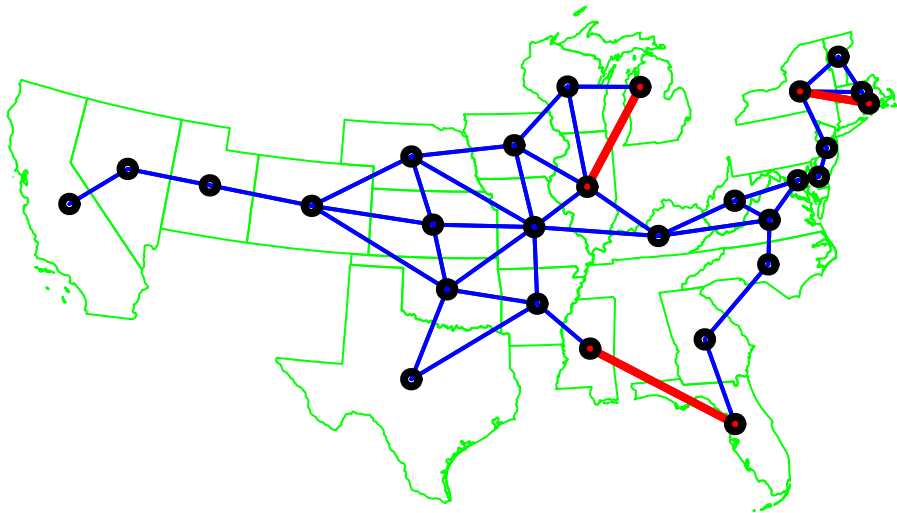

**Final US State Neighbourhood Linkage Network  
for Small Intestinal Atresia / Stenosis**

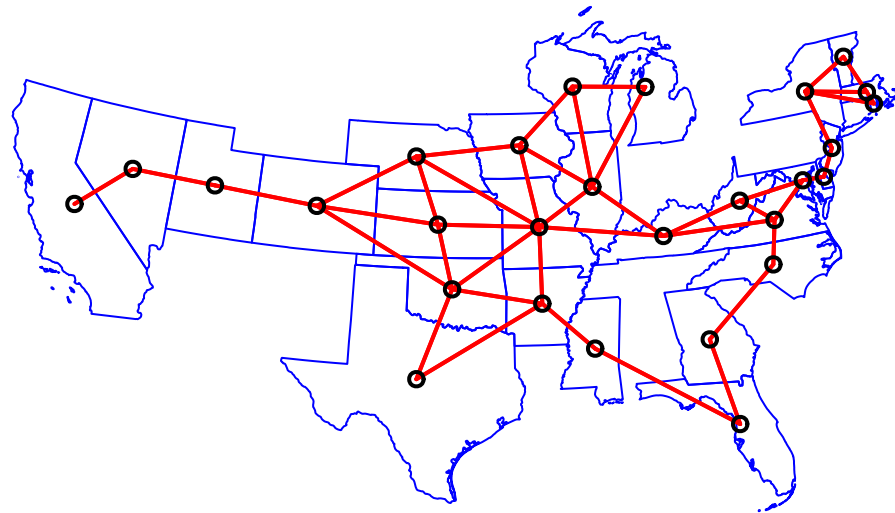

**Edited Links for OGUD Dataset of US State Neighbourhood Linkage Network**

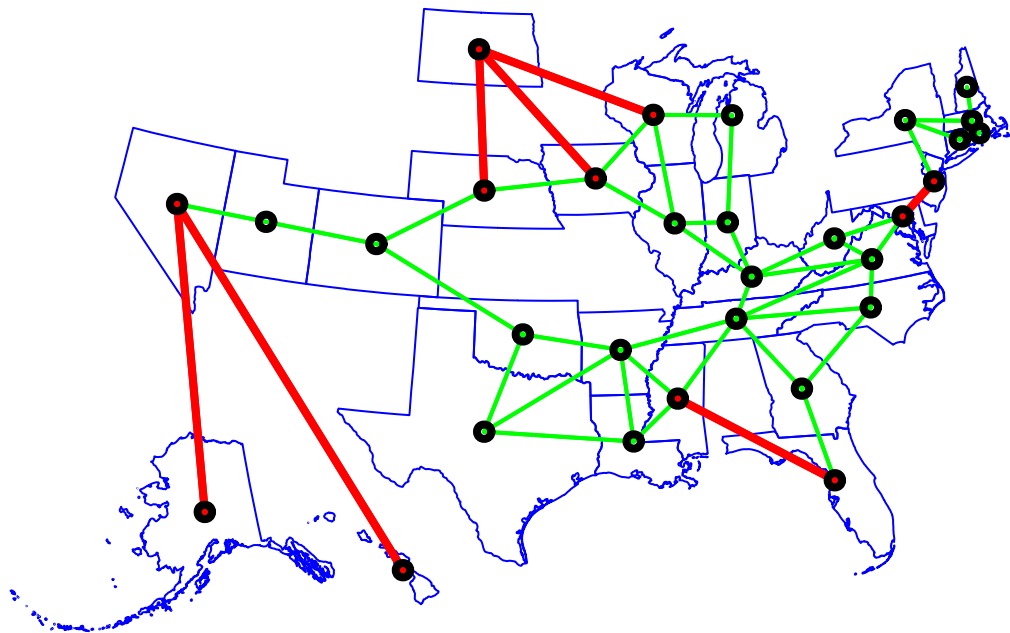

**Final Edited Links for OGUD Dataset for US State Neighbourhood Linkage Network**

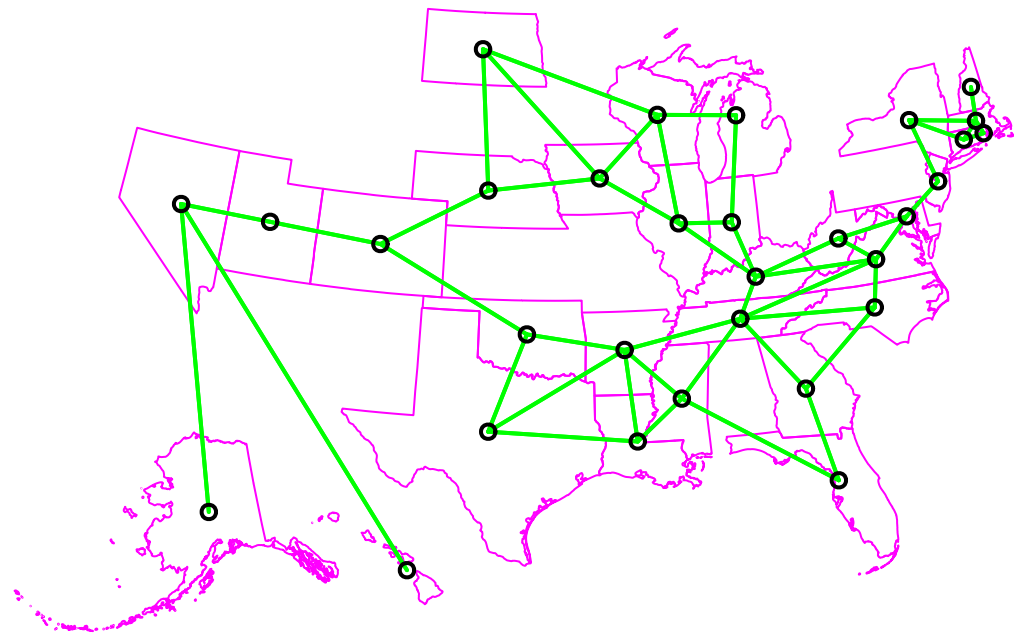

Supplement: MOESM2 [file 20048908]
