# Supplementary material for: Geotemporospatial and causal inference epidemiological analysis of US survey and overview of cannabis, cannabidiol and cannabinoid genotoxicity in relation to congenital anomalies 2001–2015
Source: BMC Pediatr. 2022 Jan 19;22:47. doi: 10.1186/s12887-021-02996-3 (PMC8767720; doi:10.1186/s12887-021-02996-3)
Supplement: Supplementary file 1 — Additional file 1. [file 12887_2021_2996_MOESM1_ESM.xlsx]

## Sheet: Contents
	Display Item	Title
	Supplementary Tables
	Supplementary Table 1	Selected Series of ETOPFA Published Rates
	Supplementary Table 2	Fraction of the Maximal Termination Rate Over Time - Western Australian Down Syndrome Dataset
	Supplementary Table 3	Congenital Anomaly Rates - Changes Over Time
	Supplementary Table 4	Congenital Anomaly Rates - Changes with Binge Alcohol Consumption
	Supplementary Table 5	Congenital Anomaly Rates - Changes with Last Month Alcohol Consumption
	Supplementary Table 6	Congenital Anomaly Rates - Changes with THC Exposure
	Supplementary Table 7	Comparison of Extreme Quintiles of Congenital Anomaly Rates for Cigarette Exposure
	Supplementary Table 8	Comparison of Extreme Quintiles of Congenital Anomaly Rates for Binge Alcohol Exposure
	Supplementary Table 9	Comparison of Extreme Quintiles of Congenital Anomaly Rates for Analgesic Exposure
	Supplementary Table 10	Comparison of Extreme Quintiles of Congenital Anomaly Rates for Cocaine Exposure
	Supplementary Table 11	Continnuous Variable Summary for All Substances
	Supplementary Table 12	Categorical Variable Summary for All Substances
	Supplementary Table 13	Small Intestinal Stenosis or Atresia - IPW Mixed Effects Final Model Results
	Supplementary Table 14	Small Intestinal Stenosis or Atresia - IPW Robust Final Model Results
	Supplementary Table 15	Small Intestinal Stenosis or Atresia - IPW Panel Final Model Results
	Supplementary Table 16	List of Minimal E-Values in Descending Order, SISA
	Supplementary Table 17	Comparison of Modelled Results for SISA Cannabidiol Percentiles
	Supplementary Table 18	Regression Summaries for Various Fitted Models of SISA - Cannabinoid Relationship
	Supplementary Table 19	E-Values from Modelled SISA - Cannabinoid Relationships
	Supplementary Table 20	Obstructive Genitourinary Disorder - IPW Mixed Effects Final Model Results
	Supplementary Table 21	Obstructive Genitourinary Disorder - IPW Robust Final Model Results
	Supplementary Table 22	Obstructive Genitourinary Disorder - IPW Panel Final Model Results
	Supplementary Table 23	List of Minimal E-Values in Descending Order - OGUD
	Supplementary Table 24	Comparison of Modelled Results for OGUD Cannabidiol Percentiles
	Supplementary Table 25	Regression Summaries for Various Fitted Models of OGUD - Cannabinoid Relationship
	Supplementary Table 26	E-Values from Modelled OGUD - Cannabinoid Relationships
	Supplementary Figures
	Supplementary Figure 1	Changes in Congenital Anomaly Rates with Binge Alcohol
	Supplementary Figure 2	Changes in Congenital Anomaly Rates with Prior Month Alcohol Consumption
	Supplementary Figure 3	Change in E-Values Over time
	Supplementary Figure 4	Change in E-Values with Binge Drinking
	Supplementary Figure 5	Contrast of Congenital Anomaly Rates in Highest and Lowest Binge Alcohol Consumption Quintiles
	Supplementary Figure 6	Contrast of Congenital Anomaly Rates in Highest and Lowest Previous Month Alcohol Consumption Quintiles
	Supplementary Figure 7	Contrast of Congenital Anomaly Rates in Highest and Lowest Previous Year Analgesic Consumption Quintiles
	Supplementary Figure 8	Contrast of Congenital Anomaly Rates in Highest and Lowest Previous Year Cocaine Consumption Quintiles
	Supplementary Figure 9	Interstate Geospatial Links for Small Intestinal Stenosis or Atresia Dataset
	Supplementary Figure 10	Interstate Geospatial Links for Obstructive Genitourinary Defect Dataset

## Sheet: ST1 ETOPFA Rates
	Congenital Anomaly	QLD.2008	QLD.2009	QLD.2010	QLD.Mean	Aust0203	Aust.ETOPFA.Rate	US.Rate	USA.ETOPFA.Relative.Rate	Composite
	Deletion 22q11.2	0	0	0	0	0	0	0	0	0.9
	Trisomy 13	0.78	0.86	0.8	0.81	0.9	1	0.38	0.62	0.9
	Trisomy 13 <35y.o.									0.9
	Anencephalus	0.73	0.69	0.48	0.63	0.89	0.9	0.78	0.22	0.89
	Trisomy 18	0.71	0.56	0.5	0.59	0.89	0.9	0.43	0.57	0.89
	Trisomy 18 <35y.o.									0.89
	Holoprosencephaly	0.44	0.36	0.5	0.43	0.8	0.5			0.8
	Turner syndrome					0.85	0.68	0	0	0.8
	Anotia/microtia	0	0	0	0	0	0	0.78	0.22	0.78
	Encephalocele	0.5	0.75	0.5	0.58	0.71	0.35	0.43	0.57	0.71
	Trisomy 21 (Down syndrome)	0.5	0.53	0.47	0.5	0.6	0.25	0.06	0.94	0.7
	Trisomy 21 (Down syndrome) <35y.o.									0.7
	Spina bifida	0.27	0.27	0.22	0.25	0.69	0.32	0.24	0.76	0.69
	Omphalocele	0.4	0	0.31	0.24	0.67	0.3	0.51	0.49	0.67
	Aniridia	0	0	0	0	0	0	0.65	0.35	0.65
	Anophthalmia/microphthalmia	0.33	0	0	0.11	0.33	0.15	0.65	0.35	0.65
	Aortic valve stenosis	0	0	0	0	0	0	0.52	0.48	0.52
	Hydrocephalus without spina bifida	0	0	0	0	0.5	0.2	0	0	0.5
	Tricuspid valve atresia and stenosis	0	0	0	0	0	0	0.49	0.51	0.49
	Hypoplastic left heart syndrome	0.1	0.09	0	0.06	0.41	0.17	0	0	0.41
	Reduction deformity, Upper limbs	0	0	0	0	0	0	0.41	0.59	0.41
	Renal agenesis/hypoplasia	0.04	0.04	0.07	0.05	0.41	0.17	0.33	0.67	0.41
	Limb deficiencies (reduction defects)	0.07	0.12	0.1	0.1	0	0	0.4	0.6	0.4
	Single ventricle	0	0	0	0	0	0	0.39	0.61	0.39
	Double outlet right ventricle	0	0	0	0	0	0	0	0	0.33
	Ebstein anomaly	0	0	0	0	0	0	0	0	0.33
	Reduction deformity, Lower limbs	0	0	0	0	0	0	0.33	0.67	0.33
	Atrioventricular septal defect	0	0	0	0	0	0	0	0	0.27
	Tetralogy of Fallot	0	0	0	0	0	0	0	0	0.25
	Coarctation of the aorta	0	0	0	0	0.13	0.15	0.15	0.85	0.24
	Transposition of great arteries	0	0	0	0	0.2	0.25	0.14	0.86	0.2
	Pulmonary valve atresia	0	0	0	0	0	0	0	0	0.19
	Pulmonary valve atresia and stenosis	0	0	0	0	0	0	0	0	0.19
	Choanal atresia	0	0	0.2	0.07	0.17	0.2	0.15	0.85	0.17
	Common truncus (truncus arteriosus)	0	0	0	0	0	0.2	0.17	0.83	0.17
	Gastroschisis	0.03	0.03	0.03	0.03	0.17	0.12	0.25	0.75	0.17
	Gastroschisis <35y.o.									0.17
	Cleft lip alone	0	0	0	0	0	0	0.16	0.84	0.16
	Dextro-transposition of great arteries (d-TGA)	0	0	0	0	0	0	0	0	0.14
	Ventricular septal defect	0	0	0	0	0	0	0.06	0.94	0.12
	Cleft palate alone	0.03	0.03	0.03	0.03	0	0	0.08	0.92	0.08
	Amniotic Bands	0	0	0	0	0	0	0	0	0
	Atrial septal defect	0	0	0	0	0	0	0	0	0
	Biliary atresia	0	0	0	0	0	0	0	0	0
	Bladder exstrophy	0	0	0	0	0	0	0	0	0
	Cleft lip with and without cleft palate	0.05	0	0.02	0.02	0	0			0
	Cleft lip with cleft palate	0	0	0	0	0	0	0	0	0
	Cloacal exstrophy	0	0	0	0	0	0	0	0	0
	Clubfoot	0	0	0	0	0	0	0	0	0
	Congenital cataract	0	0	0	0	0	0	0	0	0
	Congenital hip dislocation	0	0	0	0	0	0	0	0	0
	Congenital posterior urethral valves	0	0	0	0	0	0	0	0	0
	Craniosynostosis	0	0	0	0	0	0	0	0	0
	Diaphragmatic hernia	0.1	0	0.04	0.05	0	0	0	0	0
	Endocardial Cushion Defect						0			0
	Epispadias	0	0	0	0	0	0	0	0	0
	Esophageal atresia/tracheoesophageal fistula	0	0	0	0	0	0	0	0	0
	Foetal Alcohol						0			0
	Hirschsprung disease (congenital megacolon)	0	0	0	0	0	0	0	0	0
	Hypospadias	0	0	0	0	0	0	0	0	0
	Interrupted aortic arch	0	0	0	0	0	0	0	0	0
	Microcephalus	0	0	0	0	0	0	0	0	0
	Obstructive genitourinary defect	0	0	0	0	0	0	0	0	0
	Patent ductus arteriosus	0	0	0	0	0	0	0	0	0
	Pyloric stenosis	0	0	0	0	0	0	0	0	0
	Rectal and large intestinal atresia/stenosis	0	0.04	0.15	0.06	0	0			0
	Small intestinal atresia/stenosis	0	0	0	0	0	0	0	0	0
	Total anomalous pulmonary venous connection	0	0	0	0	0	0	0	0	0

## Sheet: ST2 FMaxTR
	Year	Downs Syndrome Live Birth Rate	Downs Syndrome ETOPFA Rate	Total Downs Syndrome Rate	Western Australian Downs Syndrome ETOPFA Rate	FMaxTR
	1980	1.09869	0	1.09869	0	0
	1981	0.853737	0.125367	0.979104	0.127466	0.164521
	1982	1.1136	0.118418	1.23202	0.0941451	0.121514
	1983	1.08501	0.111456	1.19647	0.0922951	0.119126
	1984	0.998724	0.191015	1.18974	0.158144	0.204117
	1985	1.15041	0.328296	1.47871	0.218316	0.281781
	1986	1.16508	0.407861	1.57294	0.249635	0.322206
	1987	1.02831	0.314355	1.34267	0.213062	0.275
	1988	1.08626	0.567015	1.65327	0.33228	0.428875
	1989	0.978322	0.293233	1.27155	0.227592	0.293754
	1990	1.11559	0.336752	1.45234	0.213522	0.275594
	1991	1.04373	0.423529	1.46725	0.272235	0.351375
	1992	1.26033	0.524728	1.78506	0.283382	0.365763
	1993	1.46249	0.524978	1.98747	0.252069	0.325347
	1994	0.669477	0.856977	1.52645	0.555726	0.717278
	1995	1.02309	1.11683	2.13992	0.507983	0.655655
	1996	1.08824	0.835836	1.92408	0.414082	0.534458
	1997	0.843298	1.00916	1.85246	0.532212	0.686928
	1998	0.749798	0.951703	1.7015	0.530061	0.684153
	1999	0.814946	1.02408	1.83903	0.539935	0.696896
	2000	1.27673	1.70221	2.97895	0.560614	0.723587
	2001	0.728908	1.37794	2.10685	0.645358	0.832966
	2002	1.1402	1.508	2.64819	0.542987	0.700835
	2003	0.823152	1.40729	2.23044	0.605769	0.781869
	2004	1.09744	1.7032	2.80064	0.580035	0.748653
	2005	1.04	1.86211	2.9021	0.634098	0.818433
	2006	0.838319	1.68927	2.52759	0.653869	0.843952
	2007	1.00443	1.68232	2.68675	0.600807	0.775464
	2008	0.752275	1.50949	2.26177	0.62238	0.803308
	2009	0.976089	1.9857	2.96178	0.648875	0.837506
	2010	0.958248	2.23523	3.19348	0.699713	0.903123
	2011	0.652749	2.22912	2.88187	0.781507	1.00869
	2012	0.738289	2.18024	2.91853	0.753078	0.972001
	2013	0.719959	2.08248	2.80244	0.746078	0.962966
	2014	0.51222	1.80754	2.31976	0.774771	1
	2015	0.51222	1.80754	2.31976	0.774771	1

## Sheet: ST3 Def ~ Time
			Parameters				Model				E-Values
	Congenital Anomaly	Term	Estimate	Std.Error	t-Value	P_Value	Adj.R.Squared	S.D.	t-Statistic	P-Value	E-Value - Point	E-Value - Lower
	Trisomy 21 (Down syndrome)	Year	0.0971429	0.00424483	22.885	1.51059e-73	0.577771	0.504377	523.722	1.51059e-73	1.66933	1.62558
	Trisomy 18	Year	0.0716004	0.00514669	13.9119	1.94242e-35	0.350367	0.567817	193.541	1.94242e-35	1.49088	1.44185
	Trisomy 13	Year	0.0653481	0.00527864	12.3797	1.92128e-29	0.302544	0.586039	153.258	1.92128e-29	1.45061	1.40089
	Anencephalus	Year	0.0563017	0.00549224	10.2511	6.86535e-22	0.217713	0.649374	105.086	6.86535e-22	1.38014	1.33101
	Spina bifida without anencephalus	Year	0.0458553	0.00565601	8.10735	7.14116e-15	0.144896	0.669065	65.7291	7.14116e-15	1.32607	1.27386
	Hypoplastic left heart syndrome	Year	0.0530137	0.00658014	8.05662	1.15695e-14	0.150053	0.725209	64.9091	1.15695e-14	1.33992	1.28475
	Renal agenesis/hypoplasia	Year	0.0474986	0.00646289	7.34944	1.46174e-12	0.133197	0.722057	54.0143	1.46174e-12	1.31761	1.26153
	Ebstein anomaly	Year	0.0487242	0.00670197	7.27013	2.53908e-12	0.133353	0.712287	52.8548	2.53908e-12	1.32567	1.26727
	Omphalocele	Year	0.0447792	0.00622398	7.19462	5.3337e-12	0.148098	0.559862	51.7626	5.3337e-12	1.36045	1.29398
	Ventricular septal defect	Year	0.0436167	0.00689072	6.32978	7.93135e-10	0.104716	0.742518	40.0661	7.93135e-10	1.29558	1.23522
	Hypospadias	Year	0.0638509	0.0103814	6.15052	2.49844e-09	0.110323	0.749308	37.8289	2.49844e-09	1.37581	1.29359
	Coarctation of the aorta	Year	0.0335894	0.00554593	6.05659	3.57027e-09	0.0918031	0.606329	36.6823	3.57027e-09	1.2849	1.22426
	Gastroschisis	Year	0.0471571	0.00804478	5.86183	1.1742e-08	0.0971602	0.757819	34.361	1.1742e-08	1.30657	1.23828
	Tetralogy of Fallot	Year	0.0397736	0.00686289	5.79546	1.48913e-08	0.0827958	0.757638	33.5874	1.48913e-08	1.27548	1.21433
	Obstructive genitourinary defect	Year	0.0603849	0.0107193	5.63327	8.18584e-08	0.165472	0.706256	31.7337	8.18584e-08	1.37665	1.28623
	Encephalocele	Year	0.035546	0.00640228	5.55209	5.57813e-08	0.0781133	0.708068	30.8257	5.57813e-08	1.26794	1.20591
	Anotia/microtia	Year	0.0379807	0.0068628	5.53429	6.21636e-08	0.079299	0.741607	30.6284	6.21636e-08	1.27128	1.20815
	Atrial septal defect	Year	0.0375302	0.00701731	5.34824	1.66588e-07	0.0771906	0.732213	28.6036	1.66588e-07	1.27142	1.20589
	Aortic valve stenosis	Year	0.0244295	0.00665915	3.66855	0.00028304	0.0352469	0.725263	13.4583	0.00028304	1.21028	1.13532
	Turner syndrome	Year	0.156806	0.0438745	3.57396	0.000487208	0.0791352	0.713306	12.7732	0.000487208	1.74155	1.41692
	Pulmonary valve atresia and stenosis	Year	0.0213035	0.00715041	2.97934	0.00309341	0.0222577	0.764442	8.87647	0.00309341	1.18799	1.10269
	Atrioventricular septal defect	Year	0.0523066	0.0177333	2.94962	0.00345332	0.0269522	0.786431	8.70025	0.00345332	1.31986	1.16558
	Interrupted aortic arch	Year	0.0976344	0.0335042	2.9141	0.00415423	0.0504537	0.555846	8.49197	0.00415423	1.62429	1.29242
	Congenital posterior urethral valves	Year	0.0770631	0.0266793	2.88849	0.00446908	0.0482029	0.601909	8.3434	0.00446908	1.49617	1.23782
	Pyloric stenosis	Year	0.0324007	0.0116403	2.78348	0.00606568	0.0425063	0.770121	7.74778	0.00606568	1.2404	1.11904
	Anophthalmia/microphthalmia	Year	0.018899	0.00728003	2.596	0.00985585	0.0171453	0.775918	6.73921	0.00985585	1.17379	1.0797
	Holoprosencephaly	Year	0.108156	0.0421807	2.56411	0.0113684	0.0370227	0.735181	6.57468	0.0113684	1.54793	1.21473
	Hydrocephalus without spina bifida	Year	0.0257364	0.0104465	2.46364	0.014737	0.0284694	0.73698	6.06954	0.014737	1.21486	1.08788
	Double outlet right ventricle	Year	0.0852019	0.0424085	2.00908	0.0461494	0.0178573	0.796594	4.0364	0.0461494	1.4379	1.05336
	Limb deficiencies (reduction defects)	Year	0.0811081	0.0415714	1.95105	0.0525943	0.0151868	0.788163	3.80661	0.0525943	1.42651	1
	Single ventricle	Year	0.0565534	0.0295262	1.91537	0.0573237	0.017143	0.738729	3.66862	0.0573237	1.35028	1
	Hirschsprung disease (congenital megacolon)	Year	0.0146049	0.00847479	1.72334	0.0867961	0.0123142	0.566164	2.9699	0.0867961	1.17969	1
	Epispadias	Year	0.108528	0.0680089	1.59579	0.114248	0.0176653	0.687784	2.54654	0.114248	1.57662	1
	Clubfoot	Year	0.0712431	0.0461029	1.54531	0.124666	0.0103281	0.745815	2.38798	0.124666	1.40556	1
	Reduction deformity, Lower limbs	Year	0.0111265	0.00881187	1.26267	0.208418	0.00342366	0.608033	1.59433	0.208418	1.14746	1
	Rectal and large intestinal atresia/stenosis	Year	0.00722784	0.00665573	1.08596	0.27826	0.000520966	0.763053	1.17931	0.27826	1.1021	1
	Pulmonary valve atresia	Year	0.0297863	0.0275911	1.07956	0.281683	0.000852158	0.751665	1.16546	0.281683	1.23183	1
	Total anomalous pulmonary venous connection	Year	0.0243327	0.0302356	0.804769	0.421997	-0.0019186	0.794348	0.647653	0.421997	1.19876	1
	Deletion 22q11.2	Year	0.0427531	0.0532326	0.803137	0.42351	-0.00299187	0.805423	0.645029	0.42351	1.27739	1
	Microcephalus	Year	0.00809915	0.0104835	0.772561	0.440874	-0.00240547	0.713489	0.596851	0.440874	1.11281	1
	Diaphragmatic hernia	Year	0.00424628	0.00625201	0.679186	0.497475	-0.00155938	0.709273	0.461294	0.497475	1.07958	1
	Common truncus (truncus arteriosus)	Year	0.00297879	0.00476405	0.625263	0.532209	-0.0017532	0.519884	0.390954	0.532209	1.07772	1
	Reduction deformity, Upper limbs	Year	0.00593419	0.0114014	0.520479	0.603403	-0.00425701	0.785467	0.270898	0.603403	1.09024	1
	Craniosynostosis	Year	0.0269321	0.0521728	0.516209	0.606961	-0.00803722	0.730058	0.266472	0.606961	1.22204	1
	Small intestinal atresia/stenosis	Year	0.021205	0.0468293	0.452815	0.651373	-0.00559023	0.784992	0.205041	0.651373	1.18459	1
	Cloacal exstrophy	Year	0.00752995	0.056177	0.13404	0.893608	-0.00861297	0.804451	0.0179666	0.893608	1.10144	1
	Congenital cataract	Year	0.000793892	0.00715245	0.110996	0.911688	-0.00302958	0.764767	0.0123201	0.911688	1.0317	1
	Esophageal atresia/tracheoesophageal fistula	Year	-0.0014312	0.00659539	-0.217	0.828334	-0.00270677	0.763281	0.0470889	0.828334	1.04307	NA
	Patent ductus arteriosus	Year	-0.00277092	0.0120985	-0.22903	0.819178	-0.00671768	0.752287	0.0524545	0.819178	1.0614	NA
	Choanal atresia	Year	-0.00196607	0.00727828	-0.270128	0.787229	-0.00278327	0.788156	0.0729692	0.787229	1.05	NA
	Cleft lip with cleft palate	Year	-0.0135799	0.0378639	-0.35865	0.720266	-0.00470684	0.769441	0.12863	0.720266	1.14446	NA
	Cleft lip alone	Year	-0.0166669	0.0335691	-0.496495	0.620134	-0.00406751	0.678781	0.246508	0.620134	1.1746	NA
	Amniotic Bands	Year	-0.00866042	0.0142196	-0.609049	0.543901	-0.00639476	0.754919	0.370941	0.543901	1.11347	NA
	Cleft palate alone	Year	-0.00620601	0.00913442	-0.679409	0.497469	-0.00202057	0.644608	0.461597	0.497469	1.10302	NA
	Biliary atresia	Year	-0.0054818	0.00700106	-0.782995	0.434213	-0.00121438	0.738146	0.613082	0.434213	1.08941	NA
	Bladder exstrophy	Year	-0.00726468	0.00688548	-1.05507	0.292201	0.000358026	0.719485	1.11318	0.292201	1.10575	NA
	Aniridia	Year	-0.0105902	0.0100261	-1.05626	0.29263	0.000802743	0.637883	1.11569	0.29263	1.13954	NA
	Cleft lip with and without cleft palate	Year	-0.0133996	0.0102415	-1.30837	0.19238	0.00383299	0.747596	1.71183	0.19238	1.14573	NA
	Dextro-transposition of great arteries	Year	-0.0388591	0.0295275	-1.31603	0.189847	0.00404983	0.784504	1.73193	0.189847	1.26573	NA
	Transposition of great arteries	Year	-0.0117637	0.00720715	-1.63223	0.103528	0.00470553	0.791477	2.66418	0.103528	1.1311	NA
	Tricuspid valve atresia and stenosis	Year	-0.0113762	0.004835	-2.35287	0.0191965	0.0130896	0.515864	5.53601	0.0191965	1.16408	NA
	Congenital hip dislocation	Year	-0.0594034	0.0100688	-5.89978	2.51892e-08	0.190135	0.639557	34.8074	2.51892e-08	1.398	NA

## Sheet: ST4 Def~AUD
			Parameters				Model				E-Values
	Congenital Anomaly	Term	Estimate	Std.Error	t-Value	P_Value	Adj.R.Squared	S.D.	t-Statistic	P-Value	E-Value - Point	E-Value - Lower
2	Epispadias	Binge.Alcohol	7.41166	2.62663	2.82174	0.00599052	0.0773905	0.734249	7.96222	0.00599052	19513.2	32.9836
1	Cleft lip alone	Binge.Alcohol	16.2735	5.74143	2.8344	0.00511598	0.0374072	2.34811	8.03382	0.00511598	1095.99	13.6003
3	Cleft palate alone	Binge.Alcohol	10.3806	5.96638	1.73985	0.0831206	0.00804312	2.76717	3.02708	0.0831206	60.2523	1
4	Trisomy 21 (Down syndrome)	Binge.Alcohol	39.7453	24.1379	1.64659	0.10063	0.00533583	13.3607	2.71126	0.10063	29.4613	1
5	Obstructive genitourinary defect	Binge.Alcohol	53.045	35.09	1.51168	0.133406	0.0111479	12.8404	2.28518	0.133406	85.335	1
6	Pulmonary valve atresia	Binge.Alcohol	5.63707	4.38555	1.28537	0.200251	0.00345708	1.89612	1.65219	0.200251	29.4114	1
7	Esophageal atresia/tracheoesophageal fistula	Binge.Alcohol	1.5667	1.35121	1.15948	0.247184	0.0011467	0.741555	1.3444	0.247184	13.1574	1
8	Small intestinal atresia/stenosis	Binge.Alcohol	2.90481	3.45659	0.840369	0.402114	-0.00205864	1.27182	0.70622	0.402114	15.4669	1
9	Trisomy 13	Binge.Alcohol	6.35407	10.0853	0.630033	0.529159	-0.00203463	5.40538	0.396942	0.529159	5.27674	1
10	Congenital hip dislocation	Binge.Alcohol	3.32575	18.5781	0.179015	0.858278	-0.00939469	5.9661	0.0320463	0.858278	2.7083	1
11	Pulmonary valve atresia and stenosis	Binge.Alcohol	11.1068	71.9662	0.154334	0.877452	-0.00329764	38.9882	0.023819	0.877452	1.91523	1
12	Clubfoot	Binge.Alcohol	1.27325	18.639	0.0683114	0.945645	-0.00783698	5.81579	0.00466644	0.945645	1.73917	1
13	Cloacal exstrophy	Binge.Alcohol	-0.0802213	8.06942	-0.00994139	0.992085	-0.00877106	2.81815	9.88312e-05	0.992085	1.19035	NA
14	Ventricular septal defect	Binge.Alcohol	-0.543437	38.0977	-0.0142643	0.988629	-0.00353285	20.2902	0.000203471	0.988629	1.18367	NA
15	Diaphragmatic hernia	Binge.Alcohol	-0.0380482	2.17957	-0.0174568	0.986084	-0.00338879	1.18345	0.000304738	0.986084	1.20453	NA
16	Renal agenesis/hypoplasia	Binge.Alcohol	-0.458577	5.66252	-0.0809846	0.935509	-0.00335615	3.09056	0.0065585	0.935509	1.55134	NA
17	Trisomy 18	Binge.Alcohol	-2.3233	19.0817	-0.121755	0.903173	-0.00324055	10.4177	0.0148244	0.903173	1.75001	NA
18	Turner syndrome	Binge.Alcohol	-2.96775	19.9154	-0.149018	0.881763	-0.00729576	7.18134	0.0222064	0.881763	2.272	NA
19	Spina bifida without anencephalus	Binge.Alcohol	-1.39476	7.34063	-0.190006	0.849426	-0.00303078	4.0713	0.0361022	0.849426	2.07266	NA
20	Hydrocephalus without spina bifida	Binge.Alcohol	-3.48967	12.3589	-0.282361	0.778153	-0.00766384	4.64023	0.079728	0.778153	3.37815	NA
21	Anophthalmia/microphthalmia	Binge.Alcohol	-2.1211	7.16785	-0.295919	0.767512	-0.00326934	3.82856	0.0875681	0.767512	2.69742	NA
22	Aniridia	Binge.Alcohol	-0.501843	1.32943	-0.377489	0.70658	-0.00823393	0.468107	0.142498	0.70658	4.74656	NA
23	Reduction deformity, Lower limbs	Binge.Alcohol	-3.69645	8.69718	-0.425017	0.671561	-0.00659813	3.24066	0.180639	0.671561	5.09263	NA
24	Anencephalus	Binge.Alcohol	-6.0435	13.8317	-0.436932	0.662465	-0.00260836	7.60194	0.190909	0.662465	3.54083	NA
25	Interrupted aortic arch	Binge.Alcohol	-1.21251	2.50757	-0.483541	0.629478	-0.0055427	0.897495	0.233811	0.629478	6.29525	NA
26	Deletion 22q11.2	Binge.Alcohol	-0.851491	1.6155	-0.527075	0.599148	-0.00621092	0.535771	0.277808	0.599148	7.96077	NA
27	Congenital cataract	Binge.Alcohol	-1.0998	1.94016	-0.566862	0.571256	-0.00238697	1.05023	0.321333	0.571256	4.62614	NA
28	Hirschsprung disease (congenital megacolon)	Binge.Alcohol	-2.65707	4.23703	-0.627105	0.531833	-0.00525801	1.53925	0.393261	0.531833	9.09233	NA
29	Tricuspid valve atresia and stenosis	Binge.Alcohol	-3.26377	5.17129	-0.631133	0.528447	-0.00205771	2.80246	0.398329	0.528447	5.21857	NA
30	Gastroschisis	Binge.Alcohol	-2.52854	3.90172	-0.648057	0.517493	-0.00212136	1.91257	0.419978	0.517493	6.11619	NA
31	Microcephalus	Binge.Alcohol	-8.86164	12.1793	-0.727597	0.46829	-0.00393713	4.53127	0.529397	0.46829	11.3325	NA
32	Choanal atresia	Binge.Alcohol	-1.08496	1.34563	-0.806284	0.42074	-0.00120387	0.724049	0.650094	0.42074	7.28365	NA
33	Dextro-transposition of great arteries (d-TGA)	Binge.Alcohol	-2.12517	2.4799	-0.856956	0.392641	-0.00151153	1.04687	0.734373	0.392641	12.1641	NA
34	Patent ductus arteriosus	Binge.Alcohol	-76.9074	85.8243	-0.896103	0.372308	-0.00191628	26.8825	0.803	0.372308	26.5093	NA
35	Bladder exstrophy	Binge.Alcohol	-0.290438	0.301235	-0.964158	0.335829	-0.000259842	0.160714	0.929601	0.335829	9.83027	NA
36	Cleft lip with and without cleft palate	Binge.Alcohol	-8.74198	8.13469	-1.07465	0.284535	0.00118998	3.06178	1.15488	0.284535	26.3701	NA
37	Pyloric stenosis	Binge.Alcohol	-31.8186	28.726	-1.10766	0.270447	0.00205857	10.3073	1.22691	0.270447	32.6846	NA
38	Rectal and large intestinal atresia/stenosis	Binge.Alcohol	-3.48077	2.55365	-1.36306	0.173919	0.00292948	1.40071	1.85792	0.173919	18.6783	NA
39	Hypospadias	Binge.Alcohol	-67.1262	48.2432	-1.39141	0.165221	0.00336779	24.2079	1.93603	0.165221	24.43	NA
40	Holoprosencephaly	Binge.Alcohol	-40.8785	28.2441	-1.44733	0.149978	0.00749353	10.2622	2.09477	0.149978	74.5398	NA
41	Congenital posterior urethral valves	Binge.Alcohol	-12.0377	8.26584	-1.45632	0.147496	0.00772372	2.96126	2.12087	0.147496	80.3279	NA
42	Anotia/microtia	Binge.Alcohol	-11.5817	7.71409	-1.50136	0.134335	0.00423316	4.18641	2.25409	0.134335	24.2847	NA
43	Cleft lip with cleft palate	Binge.Alcohol	-7.13111	4.5832	-1.55592	0.121483	0.0077891	1.83028	2.42089	0.121483	68.8126	NA
44	Omphalocele	Binge.Alcohol	-12.2648	7.3026	-1.67952	0.0942573	0.00695428	3.55796	2.82077	0.0942573	45.5598	NA
45	Biliary atresia	Binge.Alcohol	-1.64091	0.793451	-2.06807	0.0395616	0.0116501	0.420096	4.27692	0.0395616	69.4367	NA
46	Tetralogy of Fallot	Binge.Alcohol	-6.11237	2.94173	-2.07782	0.0385542	0.0106217	1.60682	4.31733	0.0385542	63.2354	NA
47	Atrial septal defect	Binge.Alcohol	-208.729	94.7214	-2.20361	0.0283569	0.0133953	51.3274	4.85592	0.0283569	80.4426	NA
48	Coarctation of the aorta	Binge.Alcohol	-17.0836	7.53106	-2.26842	0.0240119	0.0135417	4.08963	5.14572	0.0240119	89.0196	NA
49	Ebstein anomaly	Binge.Alcohol	-1.97975	0.850095	-2.32886	0.0205606	0.0151274	0.461048	5.4236	0.0205606	99.0532	NA
50	Single ventricle	Binge.Alcohol	-6.15221	2.50536	-2.45561	0.0152143	0.0324456	0.970454	6.03004	0.0152143	639.91	NA
51	Amniotic Bands	Binge.Alcohol	-4.41363	1.79508	-2.45873	0.0164189	0.0663467	0.511215	6.04536	0.0164189	5164.86	NA
52	Encephalocele	Binge.Alcohol	-6.12683	2.45294	-2.49775	0.0130394	0.017276	1.32315	6.23875	0.0130394	134.715	NA
53	Reduction deformity, Upper limbs	Binge.Alcohol	-10.7506	4.05771	-2.64943	0.00912117	0.0462969	1.51119	7.0195	0.00912117	1295.33	NA
54	Limb deficiencies (reduction defects)	Binge.Alcohol	-18.0716	6.62775	-2.72665	0.00704562	0.0350786	2.60707	7.43463	0.00704562	1097.28	NA
55	Aortic valve stenosis	Binge.Alcohol	-11.8839	3.90556	-3.04281	0.0025592	0.0276897	2.10408	9.25871	0.0025592	340.83	NA
56	Common truncus (truncus arteriosus)	Binge.Alcohol	-6.5532	2.1302	-3.07634	0.00229152	0.0277082	1.13623	9.46384	0.00229152	380.025	NA
57	Hypoplastic left heart syndrome	Binge.Alcohol	-9.58207	2.65614	-3.60751	0.000360409	0.0373094	1.45093	13.0142	0.000360409	814.234	NA
58	Craniosynostosis	Binge.Alcohol	-44.206	11.9614	-3.69573	0.000374208	0.12095	3.62496	13.6585	0.000374208	131993	NA
59	Transposition of great arteries	Binge.Alcohol	-11.0074	2.74599	-4.00852	7.72143e-05	0.0478253	1.48912	16.0682	7.72143e-05	1668.08	NA
60	Atrioventricular septal defect	Binge.Alcohol	-18.8809	4.62463	-4.08267	5.87567e-05	0.0548476	2.36745	16.6682	5.87567e-05	2836.66	NA
61	Total anomalous pulmonary venous connection	Binge.Alcohol	-5.09025	1.13269	-4.49394	1.25968e-05	0.0973424	0.477012	20.1955	1.25968e-05	32986.5	NA
62	Double outlet right ventricle	Binge.Alcohol	-12.9128	2.43679	-5.29908	3.77834e-07	0.143221	0.953927	28.0803	3.77834e-07	447433	NA

## Sheet: ST5 Def~Alcmon
			Parameters				Model				E-Values
	Congenital Anomaly	Term	Estimate	Std.Error	t-Value	P_Value	Adj.R.Squared	S.D.	t-Statistic	P-Value	E-Value - Point	E-Value - Lower
2	Epispadias	Alcohol.Monthly	3.13839	0.957576	3.27743	0.0015374	0.10504	0.723163	10.7415	0.0015374	103.288	9.30105
1	Trisomy 21 (Down syndrome)	Alcohol.Monthly	39.6653	9.40983	4.2153	3.25456e-05	0.0499414	13.0577	17.7688	3.25456e-05	31.2275	8.26748
3	Small intestinal atresia/stenosis	Alcohol.Monthly	3.07351	1.33208	2.30729	0.0224844	0.0293475	1.25173	5.32358	0.0224844	18.1678	2.15969
4	Obstructive genitourinary defect	Alcohol.Monthly	29.9528	14.0214	2.13623	0.0348187	0.030311	12.7153	4.56347	0.0348187	16.5452	1.68549
5	Esophageal atresia/tracheoesophageal fistula	Alcohol.Monthly	1.12813	0.537979	2.09698	0.0368351	0.0111976	0.737815	4.39733	0.0368351	7.5053	1.42611
6	Congenital hip dislocation	Alcohol.Monthly	14.9593	7.65526	1.95411	0.0533993	0.0263864	5.8594	3.81856	0.0533993	19.905	1
7	Renal agenesis/hypoplasia	Alcohol.Monthly	4.18987	2.24354	1.86753	0.0628162	0.00830637	3.07254	3.48766	0.0628162	6.37504	1
8	Trisomy 13	Alcohol.Monthly	6.56314	3.96972	1.6533	0.0993297	0.00580251	5.3842	2.73341	0.0993297	5.51435	1
9	Cleft palate alone	Alcohol.Monthly	3.15056	2.32388	1.35573	0.176413	0.00334084	2.77372	1.83801	0.176413	5.06779	1
10	Trisomy 18	Alcohol.Monthly	9.67469	7.60541	1.27208	0.204317	0.00202275	10.3904	1.61819	0.204317	4.09728	1
11	Cloacal exstrophy	Alcohol.Monthly	2.91023	3.17765	0.915843	0.361682	-0.00140398	2.80784	0.838769	0.361682	4.57493	1
12	Turner syndrome	Alcohol.Monthly	6.31224	7.84026	0.805106	0.422185	-0.00261277	7.16463	0.648196	0.422185	3.88496	1
13	Clubfoot	Alcohol.Monthly	5.28562	7.47117	0.707469	0.480571	-0.00391753	5.80447	0.500512	0.480571	4.00924	1
14	Cleft lip alone	Alcohol.Monthly	1.59423	2.34056	0.681133	0.496662	-0.00297044	2.39685	0.463943	0.496662	3.06608	1
15	Pulmonary valve atresia	Alcohol.Monthly	1.22827	1.81584	0.67642	0.49961	-0.00289375	1.90215	0.457544	0.49961	2.99934	1
16	Hypospadias	Alcohol.Monthly	12.4976	18.6988	0.668365	0.504459	-0.00200143	24.273	0.446712	0.504459	2.57482	1
17	Tricuspid valve atresia and stenosis	Alcohol.Monthly	1.32336	2.07072	0.639081	0.523271	-0.00202311	2.80241	0.408424	0.523271	2.44513	1
18	Interrupted aortic arch	Alcohol.Monthly	0.605765	0.975925	0.620709	0.535815	-0.0044421	0.897003	0.385279	0.535815	3.10152	1
19	Choanal atresia	Alcohol.Monthly	0.234962	0.544915	0.43119	0.666651	-0.00280536	0.724628	0.185925	0.666651	2.0222	1
20	Ventricular septal defect	Alcohol.Monthly	3.77936	15.1922	0.24877	0.803719	-0.00331416	20.288	0.0618865	0.803719	1.65256	1
21	Anotia/microtia	Alcohol.Monthly	0.662565	3.09264	0.21424	0.830509	-0.00324474	4.2021	0.0458986	0.830509	1.5763	1
22	Aniridia	Alcohol.Monthly	0.0820097	0.538132	0.152397	0.879169	-0.00938997	0.468375	0.0232248	0.879169	1.62281	1
23	Hirschsprung disease (congenital megacolon)	Alcohol.Monthly	0.247501	1.71534	0.144287	0.885527	-0.00851308	1.54174	0.0208187	0.885527	1.58395	1
24	Pulmonary valve atresia and stenosis	Alcohol.Monthly	2.47372	28.7481	0.086048	0.931486	-0.00335328	38.9893	0.00740425	0.931486	1.31037	1
25	Anophthalmia/microphthalmia	Alcohol.Monthly	0.0891393	2.89794	0.0307595	0.975483	-0.00358083	3.82915	0.000946147	0.975483	1.16929	1
26	Congenital cataract	Alcohol.Monthly	-0.0119039	0.782779	-0.0152072	0.987878	-0.00352031	1.05082	0.000231259	0.987878	1.11268	NA
27	Congenital posterior urethral valves	Alcohol.Monthly	-0.134515	3.18274	-0.0422638	0.966347	-0.00698043	2.98312	0.00178623	0.966347	1.25079	NA
28	Deletion 22q11.2	Alcohol.Monthly	-0.0464102	0.600092	-0.0773384	0.938488	-0.00856869	0.536398	0.00598123	0.938488	1.37962	NA
29	Diaphragmatic hernia	Alcohol.Monthly	-0.156348	0.870283	-0.179652	0.857549	-0.00328007	1.18339	0.0322747	0.857549	1.50733	NA
30	Bladder exstrophy	Alcohol.Monthly	-0.042155	0.120476	-0.349904	0.726684	-0.00324878	0.160954	0.122433	0.726684	1.85357	NA
31	Reduction deformity, Lower limbs	Alcohol.Monthly	-1.64836	3.55215	-0.464047	0.643428	-0.00631694	3.24021	0.21534	0.643428	2.55586	NA
32	Holoprosencephaly	Alcohol.Monthly	-7.31518	11.2608	-0.649613	0.516977	-0.00400218	10.3214	0.421997	0.516977	3.21988	NA
33	Single ventricle	Alcohol.Monthly	-0.696592	1.04768	-0.664891	0.507148	-0.00373335	0.988431	0.44208	0.507148	3.20556	NA
34	Microcephalus	Alcohol.Monthly	-3.70831	4.8955	-0.757494	0.450251	-0.00356435	4.53043	0.573798	0.450251	3.63251	NA
35	Spina bifida without anencephalus	Alcohol.Monthly	-2.45319	2.91321	-0.842091	0.40037	-0.000912692	4.067	0.709117	0.40037	2.85663	NA
36	Tetralogy of Fallot	Alcohol.Monthly	-1.38509	1.1752	-1.1786	0.239468	0.00125763	1.61441	1.3891	0.239468	3.79018	NA
37	Rectal and large intestinal atresia/stenosis	Alcohol.Monthly	-1.23971	1.02171	-1.21337	0.225972	0.00161475	1.40164	1.47227	0.225972	3.89928	NA
38	Hydrocephalus without spina bifida	Alcohol.Monthly	-6.19844	4.98622	-1.24312	0.216249	0.00448668	4.61217	1.54534	0.216249	6.25111	NA
39	Pyloric stenosis	Alcohol.Monthly	-15.0478	11.8329	-1.27169	0.20619	0.00557957	10.2891	1.6172	0.20619	7.0304	NA
40	Biliary atresia	Alcohol.Monthly	-0.430195	0.321389	-1.33855	0.181815	0.00283981	0.421964	1.79172	0.181815	4.49504	NA
41	Patent ductus arteriosus	Alcohol.Monthly	-50.1392	35.0896	-1.42889	0.156091	0.0100126	26.722	2.04173	0.156091	10.5048	NA
42	Cleft lip with and without cleft palate	Alcohol.Monthly	-4.69789	3.28489	-1.43015	0.155092	0.00797683	3.05136	2.04533	0.155092	7.58355	NA
43	Omphalocele	Alcohol.Monthly	-4.06845	2.83713	-1.434	0.152778	0.00404649	3.56316	2.05636	0.152778	5.09868	NA
44	Limb deficiencies (reduction defects)	Alcohol.Monthly	-4.27786	2.68162	-1.59525	0.11245	0.0086523	2.64253	2.54482	0.11245	8.19346	NA
45	Dextro-transposition of great arteries (d-TGA)	Alcohol.Monthly	-1.93373	1.00757	-1.91921	0.0565848	0.0150174	1.0382	3.68337	0.0565848	10.3675	NA
46	Encephalocele	Alcohol.Monthly	-2.03683	0.978622	-2.08133	0.0382605	0.0110573	1.32733	4.33192	0.0382605	7.54594	NA
47	Gastroschisis	Alcohol.Monthly	-3.33576	1.49211	-2.2356	0.0261866	0.0143811	1.89676	4.99791	0.0261866	9.38176	NA
48	Cleft lip with cleft palate	Alcohol.Monthly	-4.1756	1.83329	-2.27765	0.023923	0.0226133	1.81655	5.18771	0.023923	15.6818	NA
49	Coarctation of the aorta	Alcohol.Monthly	-7.10207	3.00255	-2.36534	0.0186473	0.0149867	4.08663	5.59484	0.0186473	9.19544	NA
50	Anencephalus	Alcohol.Monthly	-13.6567	5.4351	-2.51269	0.0124889	0.0167985	7.52801	6.31359	0.0124889	9.89618	NA
51	Hypoplastic left heart syndrome	Alcohol.Monthly	-2.75267	1.06663	-2.58071	0.0103207	0.0179309	1.46546	6.66008	0.0103207	10.5254	NA
52	Reduction deformity, Upper limbs	Alcohol.Monthly	-4.72867	1.64973	-2.86632	0.00488653	0.0549919	1.50429	8.2158	0.00488653	34.4351	NA
53	Amniotic Bands	Alcohol.Monthly	-2.16878	0.732884	-2.95924	0.00420529	0.098494	0.502337	8.7571	0.00420529	101.191	NA
54	Aortic valve stenosis	Alcohol.Monthly	-4.80695	1.55916	-3.08303	0.00224694	0.0284923	2.10321	9.5051	0.00224694	15.4895	NA
55	Atrial septal defect	Alcohol.Monthly	-115.901	37.5039	-3.09036	0.00219826	0.0292268	50.9139	9.5503	0.00219826	15.357	NA
56	Total anomalous pulmonary venous connection	Alcohol.Monthly	-1.53035	0.478257	-3.19985	0.00162969	0.0493436	0.48953	10.2391	0.00162969	33.8891	NA
57	Atrioventricular septal defect	Alcohol.Monthly	-6.61197	1.87053	-3.53482	0.000480243	0.0408354	2.38494	12.495	0.000480243	24.4183	NA
58	Transposition of great arteries	Alcohol.Monthly	-4.56174	1.08436	-4.20687	3.42661e-05	0.0527245	1.48529	17.6977	3.42661e-05	32.2132	NA
59	Ebstein anomaly	Alcohol.Monthly	-1.42433	0.332527	-4.28336	2.51413e-05	0.0568114	0.451185	18.3472	2.51413e-05	34.864	NA
60	Common truncus (truncus arteriosus)	Alcohol.Monthly	-3.75644	0.826917	-4.5427	8.09597e-06	0.0620148	1.11601	20.6361	8.09597e-06	42.2784	NA
61	Double outlet right ventricle	Alcohol.Monthly	-5.53748	0.981796	-5.64015	7.46207e-08	0.1598	0.944652	31.8113	7.46207e-08	414.176	NA
62	Craniosynostosis	Alcohol.Monthly	-25.5574	4.33736	-5.89238	6.34743e-08	0.268216	3.30741	34.7202	6.34743e-08	2263.77	NA

## Sheet: ST6 Def~Mrj
			Parameters				Model				E-Values
	Congenital Anomaly	Term	Estimate	Std.Error	t-Value	P_Value	Adj.R.Squared	S.D.	t-Statistic	P-Value	E-Value - Point	E-Value - Lower
1	Small intestinal atresia/stenosis	Cannabis	26.5037	3.76596	7.03769	7.66052e-11	0.253377	1.09782	49.5291	7.66052e-11	6.95312e+09	1.54999e+07
2	Trisomy 21 (Down syndrome)	Cannabis	221.119	25.4625	8.68413	2.03379e-16	0.18915	10.2305	75.4141	2.03379e-16	6.9656e+08	8.29746e+06
3	Interrupted aortic arch	Cannabis	15.4036	3.18138	4.8418	3.40312e-06	0.139015	0.83048	23.443	3.40312e-06	4.27834e+07	46764.3
4	Clubfoot	Cannabis	94.0309	21.782	4.31691	3.15598e-05	0.121095	5.43106	18.6357	3.15598e-05	1.39148e+07	11042.4
5	Congenital hip dislocation	Cannabis	115.868	32.7515	3.53779	0.00060669	0.0996913	5.6345	12.5159	0.00060669	2.6797e+08	8602.17
6	Trisomy 13	Cannabis	75.1394	14.132	5.31696	2.08239e-07	0.0840968	5.16785	28.2701	2.08239e-07	1.11498e+06	8575.76
7	Obstructive genitourinary defect	Cannabis	241.09	66.6741	3.61594	0.00044857	0.0957765	12.2786	13.075	0.00044857	1.15056e+08	7297.42
8	Congenital posterior urethral valves	Cannabis	23.9399	6.04701	3.95896	0.000118211	0.0924754	1.60006	15.6734	0.000118211	1.63716e+06	1960.9
9	Trisomy 18	Cannabis	126.97	26.3799	4.81313	2.34489e-06	0.0677521	10.0424	23.1662	2.34489e-06	198518	1849.3
10	Esophageal atresia/tracheoesophageal fistula	Cannabis	8.8449	1.89925	4.65704	4.83194e-06	0.0645114	0.717649	21.688	4.83194e-06	148559	1336.23
11	Hypospadias	Cannabis	277.179	62.0518	4.4669	1.15862e-05	0.0640412	23.4595	19.9532	1.15862e-05	93433.1	842.36
12	Biliary atresia	Cannabis	4.49702	1.24176	3.62149	0.000348263	0.0417599	0.413648	13.1152	0.000348263	39589.4	188.7
13	Deletion 22q11.2	Cannabis	6.64295	2.13561	3.11056	0.00235047	0.0690316	0.51535	9.67559	0.00235047	248502	155.04
14	Turner syndrome	Cannabis	85.6995	27.3283	3.13592	0.00210602	0.0614181	6.93207	9.83401	0.00210602	153775	137.32
15	Rectal and large intestinal atresia/stenosis	Cannabis	13.0849	3.62617	3.60847	0.000362474	0.0395402	1.37476	13.021	0.000362474	11550.2	105.07
16	Epispadias	Cannabis	12.5446	4.82742	2.59861	0.0110957	0.0648181	0.739235	6.75279	0.0110957	1.01763e+07	90.57
17	Renal agenesis/hypoplasia	Cannabis	27.3954	8.02827	3.41236	0.000733721	0.0345992	3.03154	11.6442	0.000733721	7454.4	66.37
18	Anotia/microtia	Cannabis	37.283	10.9541	3.40357	0.000757469	0.0346363	4.12201	11.5843	0.000757469	7509.49	65.76
19	Diaphragmatic hernia	Cannabis	10.283	3.06598	3.35389	0.000900966	0.0334649	1.16152	11.2486	0.000900966	6306.52	56.94
20	Cleft palate alone	Cannabis	24.1946	7.47009	3.23886	0.00136334	0.0365726	2.72709	10.4902	0.00136334	6416.06	48.45
21	Encephalocele	Cannabis	11.377	3.49987	3.25069	0.00128362	0.0311054	1.31381	10.567	0.00128362	5288.21	45.63
22	Aortic valve stenosis	Cannabis	17.8815	5.69865	3.13784	0.00187775	0.0296007	2.10201	9.84606	0.00187775	4602.09	36.41
23	Ventricular septal defect	Cannabis	166.214	53.4999	3.10682	0.00208332	0.0295651	19.9528	9.6523	0.00208332	3919.22	32.64
24	Pulmonary valve atresia	Cannabis	9.42321	3.28999	2.8642	0.00465852	0.0369033	1.00477	8.20367	0.00465852	10173.6	29.43
25	Omphalocele	Cannabis	28.8975	9.44705	3.05889	0.00245465	0.0311407	3.51436	9.35682	0.00245465	3553.39	29.18
26	Hypoplastic left heart syndrome	Cannabis	10.789	3.78732	2.84871	0.00468418	0.0224372	1.4621	8.11516	0.00468418	1648.88	15.88
27	Hirschsprung disease (congenital megacolon)	Cannabis	19.3922	8.43406	2.29927	0.0232949	0.0356368	1.50762	5.28664	0.0232949	242381	10.95
28	Limb deficiencies (reduction defects)	Cannabis	21.4215	8.57825	2.49719	0.0134367	0.0287317	2.61563	6.23596	0.0134367	3448.62	9.53
29	Bladder exstrophy	Cannabis	1.06178	0.44202	2.40211	0.0169765	0.0172975	0.159298	5.77014	0.0169765	860.983	5.62
30	Tetralogy of Fallot	Cannabis	9.90675	4.11882	2.40524	0.0167515	0.0152498	1.60306	5.78517	0.0167515	553.332	5.16
31	Total anomalous pulmonary venous connection	Cannabis	3.91763	1.79008	2.18852	0.0299409	0.0208463	0.496813	4.78964	0.0299409	2614.36	3.71
32	Reduction deformity, Lower limbs	Cannabis	16.8233	8.18856	2.05449	0.0420295	0.0251201	1.57227	4.22092	0.0420295	33865.2	2.57
33	Coarctation of the aorta	Cannabis	22.5596	10.7794	2.09283	0.0372011	0.011068	4.09475	4.37995	0.0372011	300.375	2.12
34	Atrial septal defect	Cannabis	285.362	136.778	2.08631	0.0378458	0.0116675	51.3723	4.35269	0.0378458	313.06	2.08
35	Congenital cataract	Cannabis	5.94917	2.99388	1.98711	0.0478707	0.01024	1.04359	3.94861	0.0478707	357.579	1.39
36	Spina bifida without anencephalus	Cannabis	19.7183	10.1652	1.93979	0.0532893	0.0085864	4.04766	3.76278	0.0532893	167.884	1
37	Cleft lip with cleft palate	Cannabis	11.1868	5.78633	1.93332	0.0547659	0.0149002	1.82371	3.73772	0.0547659	530.722	1
38	Choanal atresia	Cannabis	3.90656	2.04763	1.90784	0.0573989	0.00899016	0.720353	3.63987	0.0573989	277.656	1
39	Holoprosencephaly	Cannabis	72.7261	39.0245	1.8636	0.0644145	0.0167692	10.2141	3.473	0.0644145	1302.61	1
40	Cloacal exstrophy	Cannabis	20.4977	11.5158	1.77996	0.0777469	0.0185055	2.77979	3.16825	0.0777469	1640.95	1
41	Anophthalmia/microphthalmia	Cannabis	9.29921	5.26763	1.76535	0.0785986	0.0075021	1.77978	3.11646	0.0785986	231.751	1
42	Single ventricle	Cannabis	6.13054	3.73534	1.64123	0.102859	0.0111648	0.981068	2.69363	0.102859	589.186	1
43	Pulmonary valve atresia and stenosis	Cannabis	19.624	13.4446	1.45962	0.145454	0.00379198	5.03348	2.13051	0.145454	68.9709	1
44	Gastroschisis	Cannabis	5.85643	4.97559	1.17703	0.240208	0.00140461	1.9092	1.3854	0.240208	32.0999	1
45	Atrioventricular septal defect	Cannabis	6.85945	6.7893	1.01033	0.313244	7.69313e-05	2.43508	1.02077	0.313244	25.4498	1
46	Aniridia	Cannabis	2.48025	3.20292	0.77437	0.440469	-0.00382746	0.467083	0.599649	0.440469	250.468	1
47	Cleft lip alone	Cannabis	5.38041	7.55481	0.712182	0.477274	-0.00273006	2.39657	0.507204	0.477274	14.91	1
48	Microcephalus	Cannabis	12.6431	24.1277	0.524008	0.601247	-0.00608189	4.53611	0.274585	0.601247	24.7571	1
49	Patent ductus arteriosus	Cannabis	39.321	155.263	0.253254	0.800582	-0.00916936	26.9797	0.0641374	0.800582	6.99538	1
50	Cleft lip with and without cleft palate	Cannabis	-0.295683	15.7796	-0.0187384	0.985079	-0.00774919	3.07545	0.000351126	0.985079	1.40733	-
51	Double outlet right ventricle	Cannabis	-0.142921	3.49236	-0.040924	0.967407	-0.00620071	1.03377	0.00167477	0.967407	1.52399	-
52	Common truncus (truncus arteriosus)	Cannabis	-1.22548	3.07942	-0.397957	0.690949	-0.00284183	1.15394	0.158369	0.690949	4.69742	-
53	Ebstein anomaly	Cannabis	-0.565396	1.26405	-0.447289	0.655004	-0.00278528	0.465221	0.200068	0.655004	5.49412	-
54	Pyloric stenosis	Cannabis	-41.8439	60.3518	-0.693333	0.489575	-0.0047432	10.3424	0.480711	0.489575	78.9285	-
55	Tricuspid valve atresia and stenosis	Cannabis	-5.66023	7.54604	-0.750092	0.453803	-0.00149493	2.80167	0.562638	0.453803	12.0522	-
56	Amniotic Bands	Cannabis	-3.22235	4.0536	-0.794934	0.429339	-0.00521123	0.530444	0.631921	0.429339	502.823	-
57	Hydrocephalus without spina bifida	Cannabis	-20.4351	24.5694	-0.83173	0.407214	-0.00255383	4.62845	0.691774	0.407214	110.65	-
58	Dextro-transposition of great arteries (d-TGA)	Cannabis	-3.13083	3.51205	-0.891453	0.37391	-0.00116791	1.04669	0.794688	0.37391	29.9119	-
59	Anencephalus	Cannabis	-18.7394	19.537	-0.959178	0.338217	-0.00025723	7.59302	0.920022	0.338217	18.3832	-
60	Transposition of great arteries	Cannabis	-4.62341	3.98524	-1.16013	0.24692	0.0011517	1.52518	1.34591	0.24692	31.0459	-
61	Craniosynostosis	Cannabis	-38.5041	18.9772	-2.02897	0.0453834	0.0327673	3.80243	4.11672	0.0453834	20089.4	-
62	Reduction deformity, Upper limbs	Cannabis	-22.044	7.90022	-2.79031	0.00610563	0.051885	1.50676	7.78582	0.00610563	1.21054e+06	-

## Sheet: ST7 Cig Q15
	Congenital Anomaly	Numbers				Calculated Rates			Significance		E-Values
		Highest Defect Count	Highest Not Defect Count	Lowest Defect Count	Lowest Not Defect Count	Prevalence Ratio (C.I.)	Atrributable Fraction in the Exposed (C.I.)	Population Attributable Risk (C.I.)	Chi Squared	P-Value	E-Value - Point	E-Value - Lower
1	Atrial septal defect	24905	2812402	29638	8461052	2.528 (2.4857, 2.5711)	0.6023 (0.5956, 0.609)	0.275 (0.2694, 0.2806)	12406	2.2e-320	4.46623	4.38109
2	Cloacal exstrophy	285	815195	405	3290915	2.8408 (2.4413, 3.3057)	0.6479 (0.5903, 0.6974)	0.2676 (0.2203, 0.312)	199.48	1.36255e-45	5.12633	4.31621
3	Common truncus (truncus arteriosus)	276	2869033	369	8057981	2.1007 (1.7973, 2.4554)	0.524 (0.4436, 0.5927)	0.2242 (0.1707, 0.2743)	91.0626	7.03476e-22	3.62118	2.99432
4	Holoprosencephaly	401	1395418	881	5883930	1.9193 (1.7055, 2.1598)	0.4789 (0.4136, 0.5369)	0.1498 (0.1178, 0.1806)	121.298	1.65721e-28	3.24696	2.80201
5	Pyloric stenosis	2858	1031008	2213	1376378	1.7241 (1.6309, 1.8226)	0.4193 (0.3862, 0.4506)	0.2363 (0.2121, 0.2598)	378.422	1.37615e-84	2.83718	2.64168
6	Hypospadias	17894	2498640	38539	8539614	1.5869 (1.5589, 1.6153)	0.3682 (0.3569, 0.3792)	0.1167 (0.1118, 0.1217)	2634.98	2.2e-320	2.54303	2.48393
7	Choanal atresia	366	2952045	760	8554466	1.3955 (1.2319, 1.5809)	0.2834 (0.1882, 0.3674)	0.0921 (0.0546, 0.1282)	27.6895	1.42432e-07	2.13836	1.76634
8	Hydrocephalus without spina bifida	651	1090926	1222	2738731	1.3374 (1.216, 1.4709)	0.2522 (0.1776, 0.32)	0.0876 (0.057, 0.1173)	36.1344	1.8417e-09	2.00871	1.72832
9	Bladder exstrophy	82	2615425	142	7090476	1.5655 (1.1929, 2.0546)	0.3612 (0.1617, 0.5133)	0.1322 (0.0414, 0.2144)	10.6189	0.00111938	2.5064	1.67254
10	Microcephalus	649	1090928	728	1610371	1.316 (1.1838, 1.4629)	0.24 (0.1552, 0.3163)	0.1131 (0.0678, 0.1562)	26.0156	3.38669e-07	1.96036	1.65
11	Renal agenesis/hypoplasia	1201	2893499	2811	8487879	1.2533 (1.1714, 1.3409)	0.202 (0.1463, 0.2542)	0.0605 (0.0413, 0.0793)	43.0639	5.298e-11	1.81651	1.61934
12	Ventricular septal defect	12198	2800609	23237	6361701	1.1924 (1.1665, 1.2189)	0.1608 (0.1422, 0.1789)	0.0553 (0.0482, 0.0624)	247.351	7.36291e-08	1.66938	1.60547
13	Transposition of great arteries	1028	2896318	1577	5572741	1.2542 (1.1595, 1.3568)	0.2027 (0.1375, 0.2629)	0.08 (0.051, 0.1081)	32.0635	1.49215e-08	1.81874	1.58932
14	Cleft palate alone	1385	2263031	4196	8432051	1.2299 (1.1574, 1.3069)	0.1868 (0.1359, 0.2347)	0.0464 (0.0319, 0.0606)	44.7097	2.28518e-11	1.76123	1.5839
15	Craniosynostosis	370	621192	2413	5144376	1.2698 (1.1382, 1.4167)	0.2124 (0.1214, 0.294)	0.0282 (0.014, 0.0423)	18.3855	1.80425e-05	1.85485	1.53459
16	Diaphragmatic hernia	865	2951546	2063	8622701	1.2249 (1.1314, 1.3262)	0.1836 (0.1161, 0.2459)	0.0542 (0.0318, 0.0762)	25.1652	5.26234e-07	1.74967	1.51695
17	Rectal and large intestinal atresia/stenosis	1298	2893402	2962	7921314	1.1997 (1.1239, 1.2806)	0.1664 (0.1102, 0.219)	0.0507 (0.0316, 0.0694)	29.9921	4.33803e-08	1.68899	1.497
18	Hypoplastic left heart syndrome	785	2951626	1918	8641826	1.1983 (1.1028, 1.3021)	0.1654 (0.0932, 0.2319)	0.048 (0.0248, 0.0707)	18.2742	1.91282e-05	1.68564	1.43942
19	Coarctation of the aorta	1578	2950833	3990	8658741	1.1605 (1.0948, 1.2302)	0.1382 (0.0865, 0.187)	0.0392 (0.0232, 0.0549)	25.087	5.48004e-07	1.59186	1.41675
20	Dextro-transposition of great arteries (d-TGA)	473	1895486	1397	6686966	1.1945 (1.0762, 1.3257)	0.1628 (0.0708, 0.2457)	0.0412 (0.0156, 0.0661)	11.1846	0.000824805	1.6763	1.36246
21	Omphalocele	514	2637818	1411	8595708	1.1871 (1.073, 1.3132)	0.1576 (0.0681, 0.2385)	0.0421 (0.0159, 0.0676)	11.1038	0.000861528	1.6582	1.35295
22	Cleft lip with cleft palate	1023	1578620	3684	6485508	1.1408 (1.0645, 1.2227)	0.1234 (0.0605, 0.182)	0.0268 (0.0121, 0.0414)	13.9113	0.000191641	1.54143	1.3263
23	Encephalocele	275	2869034	687	8662044	1.2085 (1.0508, 1.39)	0.1725 (0.0483, 0.2805)	0.0493 (0.0105, 0.0866)	7.06624	0.00785501	1.71051	1.28181
24	Tetralogy of Fallot	1264	2951147	3379	8659352	1.0976 (1.0289, 1.1709)	0.0889 (0.0281, 0.1459)	0.0242 (0.0069, 0.0412)	7.98382	0.00471971	1.42485	1.20138
25	Reduction deformity, Lower limbs	193	1091384	397	2739556	1.2203 (1.0275, 1.4493)	0.1805 (0.0267, 0.31)	0.059 (0.0046, 0.1105)	5.16432	0.0230554	1.73872	1.19546
26	Limb deficiencies (reduction defects)	653	1559446	2285	5969989	1.094 (1.0029, 1.1935)	0.0859 (0.0029, 0.162)	0.0191 (0, 0.0379)	4.10292	0.0428091	1.41466	1.05668
27	Interrupted aortic arch	80	1194424	311	5884500	1.2673 (0.9912, 1.6203)	0.2109 (-0.0089, 0.3828)	0.0432 (-0.0062, 0.0901)	3.58735	0.0582209	1.84929	1
28	Esophageal atresia/tracheoesophageal fistula	636	2894064	1763	8660968	1.0796 (0.986, 1.1821)	0.0737 (-0.0142, 0.154)	0.0195 (-0.0043, 0.0428)	2.74255	0.0977086	1.3727	1
29	Ebstein anomaly	210	2813265	571	8662160	1.1324 (0.9667, 1.3265)	0.1169 (-0.0344, 0.2461)	0.0314 (-0.0106, 0.0718)	2.37646	0.123176	1.51957	1
30	Cleft lip with and without cleft palate	1144	1201587	2467	2737486	1.0565 (0.9849, 1.1332)	0.0534 (-0.0153, 0.1175)	0.0169 (-0.0052, 0.0385)	2.35618	0.124788	1.30052	1
31	Hirschsprung disease (congenital megacolon)	225	1033641	312	1610787	1.1238 (0.9468, 1.334)	0.1102 (-0.0562, 0.2503)	0.0462 (-0.0249, 0.1123)	1.78299	0.181782	1.49677	1
32	Congenital posterior urethral valves	215	1383529	586	4172846	1.1066 (0.9465, 1.2938)	0.0963 (-0.0565, 0.227)	0.0258 (-0.0159, 0.0659)	1.61454	0.203855	1.44997	1
33	Cleft lip alone	527	1604364	1848	5976060	1.0622 (0.9642, 1.1702)	0.0586 (-0.0371, 0.1454)	0.013 (-0.0084, 0.034)	1.49472	0.221486	1.31929	1
34	Spina bifida without anencephalus	1075	3102215	2881	8640863	1.0393 (0.969, 1.1147)	0.0378 (-0.032, 0.1029)	0.0103 (-0.0087, 0.0289)	1.16435	0.280565	1.24143	1
35	Pulmonary valve atresia	242	1895717	773	6400059	1.0569 (0.9148, 1.2211)	0.0539 (-0.0931, 0.181)	0.0128 (-0.0217, 0.0462)	0.565086	0.452218	1.30221	1
36	Clubfoot	1721	1274564	4572	3456538	1.0208 (0.9658, 1.0791)	0.0204 (-0.0354, 0.0732)	0.0056 (-0.0096, 0.0205)	0.530836	0.466256	1.16653	1
37	Aniridia	17	1033849	20	1513379	1.2443 (0.6518, 2.3753)	0.1963 (-0.5342, 0.579)	0.0902 (-0.2245, 0.324)	0.440605	0.506831	1.79553	1
38	Double outlet right ventricle	331	1571352	1118	5497575	1.0358 (0.9163, 1.171)	0.0346 (-0.0914, 0.146)	0.0079 (-0.0203, 0.0353)	0.316267	0.57386	1.22841	1
39	Biliary atresia	198	2894502	569	8525097	1.0249 (0.8719, 1.2048)	0.0243 (-0.147, 0.17)	0.0063 (-0.0361, 0.0469)	0.0888011	0.765707	1.18461	1
40	Gastroschisis	1193	2709479	3678	8352525	0.9999 (0.9367, 1.0674)	-1e-04 (-0.0676, 0.0631)	0 (-0.0161, 0.0158)	7.36814e-06	0.997834	1.0096	NA
41	Pulmonary valve atresia and stenosis	2349	2950062	5691	7140967	0.9991 (0.9522, 1.0483)	-9e-04 (-0.0501, 0.0461)	-3e-04 (-0.0144, 0.0137)	0.00126984	0.971573	1.03045	NA
42	Aortic valve stenosis	491	2951920	1493	8604137	0.9586 (0.8656, 1.0615)	-0.0432 (-0.1552, 0.0579)	-0.0107 (-0.0365, 0.0145)	0.661462	0.416044	1.25553	NA
43	Patent ductus arteriosus	3531	978534	5456	1445453	0.956 (0.9163, 0.9974)	-0.0459 (-0.091, -0.0026)	-0.018 (-0.0351, -0.0013)	4.32812	0.0374876	1.26489	NA
44	Atrioventricular septal defect	1244	2951167	3855	8658876	0.9468 (0.8882, 1.0093)	-0.0562 (-0.1258, 0.0092)	-0.0137 (-0.0296, 0.002)	2.80891	0.0937418	1.29967	NA
45	Amniotic Bands	38	403544	250	2509763	0.9453 (0.672, 1.3298)	-0.0578 (-0.488, 0.248)	-0.0076 (-0.054, 0.0367)	0.104264	0.746771	1.30514	NA
46	Congenital hip dislocation	613	1090964	734	1217667	0.9321 (0.8373, 1.0377)	-0.0728 (-0.1942, 0.0363)	-0.0331 (-0.0848, 0.0161)	1.64909	0.199083	1.35212	NA
47	Congenital cataract	409	2894291	1308	8623456	0.9317 (0.8337, 1.0411)	-0.0733 (-0.1994, 0.0394)	-0.0175 (-0.0447, 0.0091)	1.56195	0.21138	1.35393	NA
48	Obstructive genitourinary defect	2295	1031571	3893	1607206	0.9185 (0.8723, 0.9672)	-0.0885 (-0.1461, -0.0339)	-0.0328 (-0.0528, -0.0133)	10.4221	0.00124519	1.39899	NA
49	Reduction deformity, Upper limbs	291	1091286	810	2739143	0.9017 (0.7887, 1.031)	-0.1089 (-0.2679, 0.0301)	-0.0288 (-0.0659, 0.007)	2.29134	0.130097	1.45648	NA
50	Anencephalus	494	2868815	1687	8748507	0.893 (0.8078, 0.9872)	-0.1198 (-0.2379, -0.013)	-0.0271 (-0.0507, -0.0041)	4.89971	0.0268612	1.48612	NA
51	Small intestinal atresia/stenosis	358	1136991	2081	5710689	0.8641 (0.7724, 0.9666)	-0.1573 (-0.2946, -0.0345)	-0.0231 (-0.0401, -0.0064)	6.53091	0.0106016	1.5839	NA
52	Single ventricle	84	1199153	493	5884318	0.8361 (0.6634, 1.0537)	-0.196 (-0.5073, 0.051)	-0.0285 (-0.0638, 0.0055)	2.30604	0.128872	1.68023	NA
53	Trisomy 21 (Down syndrome)	3400	2891300	12320	8737874	0.834 (0.8029, 0.8663)	-0.1987 (-0.2451, -0.1541)	-0.043 (-0.0516, -0.0345)	87.8999	1.75419e-07	1.68679	NA
54	Epispadias	95	970896	163	1340312	0.8046 (0.6247, 1.0362)	-0.2429 (-0.6006, 0.0349)	-0.0894 (-0.1958, 0.0075)	2.84848	0.0914601	1.79225	NA
55	Anophthalmia/microphthalmia	264	2894436	984	8572315	0.7946 (0.6937, 0.9102)	-0.2585 (-0.4416, -0.0986)	-0.0547 (-0.0854, -0.0248)	11.0521	0.000885888	1.82883	NA
56	Tricuspid valve atresia and stenosis	287	2952124	1243	8564259	0.6698 (0.5891, 0.7616)	-0.4928 (-0.6973, -0.313)	-0.0924 (-0.1191, -0.0665)	37.9418	7.28874e-10	2.35059	NA
57	Trisomy 18	497	2894203	2254	8660477	0.6598 (0.5987, 0.7271)	-0.5155 (-0.67, -0.3752)	-0.0931 (-0.1125, -0.0741)	71.413	0.000605351	2.39931	NA
58	Total anomalous pulmonary venous connection	143	1599149	1004	7009933	0.6243 (0.524, 0.7439)	-0.6016 (-0.9082, -0.3442)	-0.075 (-0.0987, -0.0518)	28.2882	1.04531e-07	2.58316	NA
59	Trisomy 13	228	2894472	1105	8642492	0.6161 (0.5342, 0.7105)	-0.6231 (-0.8718, -0.4074)	-0.1066 (-0.1339, -0.0799)	45.2116	1.7685e-11	2.62869	NA
60	Turner syndrome	212	1465313	903	3824744	0.6128 (0.5277, 0.7117)	-0.6317 (-0.8949, -0.405)	-0.1201 (-0.1524, -0.0887)	41.9973	9.13997e-11	2.64696	NA
61	Deletion 22q11.2	66	1258090	355	3995016	0.5904 (0.454, 0.7678)	-0.6938 (-1.2027, -0.3025)	-0.1088 (-0.1554, -0.064)	15.8172	6.97647e-05	2.77784	NA
62	Anotia/microtia	261	2832551	2179	8660552	0.3662 (0.3221, 0.4164)	-1.7301 (-2.1041, -1.4012)	-0.1851 (-0.2015, -0.1689)	255.603	9.45087e-10	4.90344	NA

## Sheet: ST8 Bng Q15
	Congenital Anomaly	Numbers				Calculated Rates			Significance		E-Values
		Highest Defect Count	Highest Not Defect Count	Lowest Defect Count	Lowest Not Defect Count	Prevalence Ratio (C.I.)	Atrributable Fraction in the Exposed (C.I.)	Population Attributable Risk (C.I.)	Chi Squared	P-Value	E-Value - Point	E-Value - Lower
1	Turner syndrome	389	1487446	616	2696505	1.1448 (1.0083, 1.2998)	0.1265 (0.0082, 0.2306)	0.0489 (0.0011, 0.0945)	4.36569	0.0366697	1.55184	1.09988
1	Choanal atresia	347	2926135	575	4969003	1.0248 (0.897, 1.1709)	0.0242 (-0.1149, 0.1459)	0.0091 (-0.0418, 0.0576)	0.129798	0.718641	1.18418	1
2	Anophthalmia/microphthalmia	345	2913440	572	4969006	1.0287 (0.9, 1.1757)	0.0279 (-0.1111, 0.1495)	0.0105 (-0.0405, 0.059)	0.172231	0.678136	1.20049	1
3	Cleft palate alone	1488	2485687	2753	4665834	1.0146 (0.9525, 1.0806)	0.0143 (-0.0498, 0.0746)	0.005 (-0.0172, 0.0268)	0.201827	0.65325	1.13608	1
4	Obstructive genitourinary defect	2594	1130069	3100	1375711	1.0187 (0.9668, 1.0733)	0.0183 (-0.0342, 0.0681)	0.0083 (-0.0155, 0.0316)	0.481791	0.487612	1.15634	1
5	Cleft lip alone	625	1799417	1012	3020883	1.0368 (0.9384, 1.1455)	0.0355 (-0.0656, 0.127)	0.0136 (-0.0247, 0.0504)	0.504928	0.477343	1.23214	1
6	Hydrocephalus without spina bifida	719	1131944	1191	1940060	1.0347 (0.9432, 1.1351)	0.0335 (-0.0602, 0.1189)	0.0126 (-0.0224, 0.0464)	0.52091	0.470454	1.22403	1
7	Esophageal atresia/tracheoesophageal fistula	712	2931993	1149	5019894	1.0609 (0.9662, 1.1649)	0.0574 (-0.0349, 0.1415)	0.022 (-0.0136, 0.0563)	1.53847	0.214845	1.31517	1
8	Epispadias	93	1029854	104	1407542	1.2222 (0.924, 1.6167)	0.1818 (-0.0823, 0.3814)	0.0858 (-0.0432, 0.1989)	1.98285	0.15909	1.74323	1
9	Congenital hip dislocation	602	1015885	453	836176	1.0938 (0.9683, 1.2357)	0.0857 (-0.0328, 0.1906)	0.0489 (-0.0196, 0.1128)	2.07954	0.149285	1.41405	1
10	Trisomy 21 (Down syndrome)	4265	2928440	7353	5216565	1.0332 (0.995, 1.073)	0.0321 (-0.0051, 0.0679)	0.0118 (-0.002, 0.0254)	2.88299	0.0895196	1.21839	1
11	Deletion 22q11.2	118	1457275	141	2187039	1.256 (0.9835, 1.6039)	0.2038 (-0.0168, 0.3765)	0.0928 (-0.0141, 0.1885)	3.35086	0.06717	1.82291	1
2	Craniosynostosis	374	1057906	1198	2070852	0.6111 (0.5441, 0.6864)	-0.636 (-0.8374, -0.4567)	-0.1513 (-0.1836, -0.12)	70.5073	1	2.65607	-
3	Coarctation of the aorta	1149	2752536	2975	5018068	0.7041 (0.6578, 0.7537)	-0.42 (-0.52, -0.3266)	-0.117 (-0.1384, -0.096)	103.02	0.881971	2.19226	-
4	Patent ductus arteriosus	3020	1129643	4509	1214112	0.7199 (0.6874, 0.7539)	-0.3877 (-0.4531, -0.3253)	-0.1555 (-0.1771, -0.1344)	196.562	0.802775	2.12126	-
5	Bladder exstrophy	68	2756256	134	5020909	0.9244 (0.6904, 1.2377)	-0.0818 (-0.4483, 0.192)	-0.0275 (-0.1336, 0.0686)	0.278777	0.597504	1.37917	-
6	Trisomy 13	366	2914234	629	4836101	0.9656 (0.8489, 1.0984)	-0.0356 (-0.178, 0.0896)	-0.0131 (-0.0623, 0.0338)	0.283359	0.594508	1.22765	-
7	Reduction deformity, Lower limbs	171	1132492	317	1969769	0.9382 (0.779, 1.13)	-0.0658 (-0.2836, 0.115)	-0.0231 (-0.0919, 0.0415)	0.451412	0.501665	1.33064	-
8	Reduction deformity, Upper limbs	321	1132342	589	1969497	0.9479 (0.8274, 1.086)	-0.0549 (-0.2086, 0.0792)	-0.0194 (-0.0695, 0.0284)	0.594542	0.440668	1.29567	-
9	Hypospadias	15087	2761671	32622	5191296	0.8694 (0.8527, 0.8863)	-0.1493 (-0.1717, -0.1274)	-0.0472 (-0.0536, -0.0409)	201.385	0.436166	1.56364	-
10	Interrupted aortic arch	75	1350739	185	2838313	0.8519 (0.6514, 1.114)	-0.1739 (-0.5351, 0.1024)	-0.0502 (-0.1347, 0.0281)	1.37431	0.241073	1.62563	-
11	Ventricular septal defect	10603	2922102	21256	4917576	0.8395 (0.8201, 0.8593)	-0.1904 (-0.2184, -0.163)	-0.0634 (-0.0716, -0.0552)	216.335	0.149035	1.66651	-
12	Cleft lip with and without cleft palate	1045	1131618	1878	1922152	0.9452 (0.8763, 1.0195)	-0.058 (-0.141, 0.0191)	-0.0207 (-0.0487, 0.0065)	2.13377	0.144086	1.30558	-
13	Tricuspid valve atresia and stenosis	384	2863912	739	5020304	0.9109 (0.8052, 1.0304)	-0.0978 (-0.2419, 0.0295)	-0.0335 (-0.078, 0.0092)	2.20349	0.137699	1.42557	-
14	Congenital cataract	424	2926058	800	5020243	0.9093 (0.8083, 1.0229)	-0.0997 (-0.2371, 0.0224)	-0.0345 (-0.0776, 0.0068)	2.50551	0.113449	1.43083	-
15	Pyloric stenosis	758	1042343	2852	1375959	0.3508 (0.3238, 0.3801)	-1.8464 (-2.0837, -1.6275)	-0.3877 (-0.4112, -0.3646)	718.336	0.105122	5.13899	-
16	Pulmonary valve atresia	165	2189334	568	3406547	0.452 (0.3801, 0.5376)	-1.2122 (-1.6309, -0.8601)	-0.2729 (-0.3235, -0.2242)	84.9384	0.097805	3.84975	-
17	Dextro-transposition of great arteries (d-TGA)	411	1952155	807	3406308	0.8887 (0.7891, 1.0007)	-0.1253 (-0.2671, 7e-04)	-0.0423 (-0.0849, -0.0013)	3.79753	0.0513284	1.50068	-
18	Pulmonary valve atresia and stenosis	1752	2751933	4486	5016557	0.7119 (0.6737, 0.7524)	-0.4043 (-0.4839, -0.3288)	-0.1135 (-0.1309, -0.0964)	146.743	0.040804	2.15769	-
19	Cloacal exstrophy	244	1141453	665	2640770	0.8489 (0.733, 0.983)	-0.178 (-0.3641, -0.0173)	-0.0478 (-0.0899, -0.0073)	4.80193	0.0284279	1.6359	-
20	Atrial septal defect	10762	2921943	31601	4768048	0.5557 (0.5437, 0.568)	-0.7942 (-0.8338, -0.7554)	-0.2018 (-0.2084, -0.1951)	2837.71	0.0215222	2.98788	-
21	Renal agenesis/hypoplasia	1255	2918753	2352	5047526	0.9228 (0.8616, 0.9882)	-0.0837 (-0.1605, -0.0119)	-0.0291 (-0.0539, -0.0049)	5.28891	0.0214616	1.38478	-
22	Anotia/microtia	438	2932267	865	5020178	0.8669 (0.7728, 0.9725)	-0.1535 (-0.294, -0.0283)	-0.0516 (-0.093, -0.0117)	5.94018	0.0147995	1.57428	-
23	Trisomy 18	741	2931964	1426	5048452	0.8947 (0.8187, 0.9778)	-0.1176 (-0.2213, -0.0227)	-0.0402 (-0.0723, -0.0091)	6.03627	0.0140149	1.48015	-
24	Small intestinal atresia/stenosis	431	1366133	1033	2837465	0.8666 (0.7745, 0.9697)	-0.1539 (-0.2911, -0.0312)	-0.0453 (-0.0805, -0.0113)	6.24374	0.0124633	1.57528	-
25	Aniridia	7	1053551	31	1600174	0.343 (0.151, 0.7788)	-1.9157 (-5.6213, -0.2839)	-0.3529 (-0.5736, -0.1632)	7.1879	0.00733969	5.27914	-
26	Limb deficiencies (reduction defects)	652	1654231	1326	2924635	0.8693 (0.7915, 0.9548)	-0.1503 (-0.2633, -0.0473)	-0.0495 (-0.0825, -0.0176)	8.5827	0.00339371	1.56599	-
27	Amniotic Bands	66	741053	193	1414562	0.6528 (0.4936, 0.8633)	-0.5319 (-1.0258, -0.1584)	-0.1355 (-0.2193, -0.0575)	9.0831	0.00257983	2.43449	-
28	Gastroschisis	1069	2558566	2283	4854973	0.8885 (0.8262, 0.9555)	-0.1254 (-0.2102, -0.0466)	-0.04 (-0.0644, -0.0162)	10.1814	0.00141868	1.50112	-
29	Cleft lip with cleft palate	898	1799144	1694	2919015	0.8601 (0.7932, 0.9326)	-0.1626 (-0.2605, -0.0723)	-0.0563 (-0.0864, -0.0271)	13.3542	0.000257841	1.59739	-
30	Ebstein anomaly	165	2793604	419	5020624	0.7077 (0.5911, 0.8474)	-0.4129 (-0.6918, -0.18)	-0.1167 (-0.175, -0.0613)	14.2884	0.000156825	2.17681	-
31	Diaphragmatic hernia	669	2751464	1472	5019571	0.8291 (0.7567, 0.9085)	-0.206 (-0.3214, -0.1007)	-0.0644 (-0.0952, -0.0344)	16.1931	5.72025e-05	1.7045	-
32	Microcephalus	544	1132119	846	1377965	0.7827 (0.7027, 0.8717)	-0.2775 (-0.4228, -0.1471)	-0.1086 (-0.1563, -0.0629)	19.9716	7.85997e-06	1.87295	-
33	Omphalocele	507	2680716	1150	4784370	0.7868 (0.7088, 0.8735)	-0.2708 (-0.4108, -0.1448)	-0.0829 (-0.118, -0.0488)	20.316	6.56497e-06	1.85754	-
34	Spina bifida without anencephalus	914	2931791	1920	5134535	0.8337 (0.7706, 0.902)	-0.1994 (-0.2977, -0.1086)	-0.0643 (-0.0917, -0.0376)	20.5325	5.86286e-06	1.68841	-
35	Encephalocele	199	2895061	505	5020538	0.6834 (0.58, 0.8052)	-0.4633 (-0.7241, -0.2419)	-0.131 (-0.1846, -0.0797)	20.9408	4.73689e-06	2.28666	-
36	Biliary atresia	128	2888909	352	4969226	0.6255 (0.5109, 0.7657)	-0.5987 (-0.9571, -0.3059)	-0.1597 (-0.2239, -0.0988)	21.0468	4.48196e-06	2.57703	-
37	Clubfoot	1915	1477729	3873	2626058	0.8787 (0.8318, 0.9282)	-0.1379 (-0.2019, -0.0773)	-0.0456 (-0.0647, -0.0269)	21.4353	3.65962e-06	1.53394	-
38	Rectal and large intestinal atresia/stenosis	1082	2931623	2203	5018840	0.8408 (0.7818, 0.9043)	-0.1892 (-0.279, -0.1058)	-0.0623 (-0.0881, -0.0372)	21.855	2.94044e-06	1.66358	-
39	Total anomalous pulmonary venous connection	131	1901745	362	3238812	0.6163 (0.5047, 0.7526)	-0.6225 (-0.9814, -0.3286)	-0.1654 (-0.229, -0.1051)	22.9758	1.64053e-06	2.62749	-
40	Transposition of great arteries	742	2751391	1625	4826859	0.8011 (0.7344, 0.8737)	-0.2483 (-0.3615, -0.1445)	-0.0778 (-0.1076, -0.0489)	25.1612	5.27339e-07	1.80496	-
41	Double outlet right ventricle	308	1980306	644	2837854	0.6854 (0.5983, 0.7851)	-0.459 (-0.6711, -0.2737)	-0.1485 (-0.2001, -0.0991)	30.089	4.12663e-08	2.27728	-
42	Hirschsprung disease (congenital megacolon)	147	1119819	316	1378495	0.5726 (0.4709, 0.6964)	-0.7461 (-1.1235, -0.4358)	-0.2369 (-0.3162, -0.1624)	31.9913	1.54866e-08	2.88749	-
43	Common truncus (truncus arteriosus)	141	2886118	425	5020618	0.5771 (0.477, 0.6982)	-0.7327 (-1.0962, -0.4322)	-0.1825 (-0.24, -0.1277)	32.8024	1.02016e-08	2.85934	-
44	Aortic valve stenosis	417	2907219	1008	5020035	0.7143 (0.6373, 0.8007)	-0.3998 (-0.569, -0.2489)	-0.117 (-0.1549, -0.0803)	33.6905	6.46169e-09	2.14792	-
45	Single ventricle	81	1654802	301	2838197	0.4615 (0.3611, 0.5899)	-1.1665 (-1.7689, -0.6952)	-0.2473 (-0.314, -0.1841)	40.0904	2.42483e-10	3.75624	-
46	Anencephalus	454	2907182	1114	5001410	0.7011 (0.6286, 0.782)	-0.4262 (-0.5906, -0.2788)	-0.1234 (-0.1595, -0.0885)	41.0891	1.45448e-10	2.20584	-
47	Congenital posterior urethral valves	220	1616925	638	2837860	0.6052 (0.5192, 0.7054)	-0.6522 (-0.9258, -0.4175)	-0.1672 (-0.214, -0.1223)	42.1232	8.57002e-11	2.69022	-
48	Tetralogy of Fallot	1022	2931683	2249	5047629	0.7824 (0.7266, 0.8425)	-0.278 (-0.376, -0.1869)	-0.0869 (-0.1123, -0.062)	42.5067	7.04412e-11	1.87402	-
49	Atrioventricular septal defect	1227	2931478	2661	5018382	0.7894 (0.7377, 0.8446)	-0.2667 (-0.3553, -0.1839)	-0.0842 (-0.1076, -0.0613)	47.1798	6.47649e-12	1.84794	-
50	Hypoplastic left heart syndrome	574	2932131	1442	5048436	0.6854 (0.6222, 0.755)	-0.459 (-0.6071, -0.3245)	-0.1307 (-0.1622, -0.1)	59.291	1.35447e-14	2.27724	-
51	Holoprosencephaly	240	1487595	814	2837684	0.5624 (0.487, 0.6495)	-0.7778 (-1.053, -0.5394)	-0.1771 (-0.2163, -0.1391)	63.0872	1.9984e-15	2.95368	-

## Sheet: ST9 Anl Q15
	Congenital Anomaly	Numbers				Calculated Rates			Significance		E-Values
		Highest Defect Count	Highest Not Defect Count	Lowest Defect Count	Lowest Not Defect Count	Prevalence Ratio (C.I.)	Atrributable Fraction in the Exposed (C.I.)	Population Attributable Risk (C.I.)	Chi Squared	P-Value	E-Value - Point	E-Value - Lower
1	Deletion 22q11.2	244	1666181	154	3077519	2.9265 (2.3919, 3.5806)	0.6583 (0.5819, 0.7207)	0.4036 (0.325, 0.4729)	119.72	3.67267e-28	5.30034	4.21613
2	Pyloric stenosis	2278	751804	2995	1880526	1.9025 (1.8015, 2.0092)	0.4736 (0.4442, 0.5015)	0.2046 (0.1857, 0.2231)	552.521	1.78362e-122	3.20726	2.99828
3	Aortic valve stenosis	1339	3127775	1488	5527422	1.5902 (1.4771, 1.7121)	0.3711 (0.3229, 0.4158)	0.1758 (0.1464, 0.2041)	154.348	9.7826e-36	2.55855	2.31605
4	Pulmonary valve atresia	527	2299742	601	4308236	1.6427 (1.4613, 1.8465)	0.3912 (0.3157, 0.4584)	0.1828 (0.1369, 0.2262)	70.5897	2.22939e-17	2.66988	2.28223
5	Cloacal exstrophy	300	690662	789	2915718	1.6052 (1.4053, 1.8335)	0.3769 (0.2883, 0.4545)	0.1038 (0.0704, 0.1361)	49.5727	1.91158e-12	2.59023	2.15971
6	Gastroschisis	1962	3123306	2320	5435614	1.4718 (1.3859, 1.563)	0.3204 (0.2783, 0.3601)	0.1468 (0.123, 0.17)	160.675	9.74334e-13	2.30443	2.11669
7	Anotia/microtia	2141	3139345	2717	5498822	1.3802 (1.3042, 1.4607)	0.2754 (0.2331, 0.3152)	0.1214 (0.0992, 0.143)	125.361	4.05412e-37	2.10413	1.93367
8	Spina bifida without anencephalus	3667	3368556	4426	5537454	1.362 (1.3036, 1.4229)	0.2656 (0.2327, 0.297)	0.1203 (0.1027, 0.1376)	192.732	2.13816e-29	2.06322	1.932
9	Anencephalus	3343	3356508	3905	5316581	1.356 (1.2948, 1.4201)	0.2623 (0.2275, 0.2956)	0.121 (0.1021, 0.1395)	168.188	4.04722e-44	2.05	1.91191
10	Aniridia	56	928458	67	2045264	1.8412 (1.2912, 2.6256)	0.4569 (0.2255, 0.6191)	0.208 (0.0691, 0.3262)	11.7228	0.000617396	3.0856	1.90425
11	Atrial septal defect	15889	2453647	24865	5043486	1.3135 (1.2875, 1.34)	0.2375 (0.2222, 0.2525)	0.0926 (0.0855, 0.0996)	721.026	9.25889e-39	1.9506	1.89177
12	Cleft lip with cleft palate	1602	2304584	1857	3656502	1.3687 (1.2802, 1.4634)	0.2693 (0.2188, 0.3165)	0.1247 (0.0972, 0.1514)	85.387	0.000331761	2.07862	1.87878
13	Total anomalous pulmonary venous connection	320	2255319	417	4220138	1.4359 (1.2413, 1.6611)	0.3036 (0.1944, 0.398)	0.1318 (0.0751, 0.185)	23.9585	9.84339e-07	2.22697	1.78847
14	Cleft lip with and without cleft palate	1048	981049	1543	1881978	1.3029 (1.2046, 1.4093)	0.2323 (0.1697, 0.2902)	0.094 (0.0648, 0.1222)	43.9119	3.43494e-11	1.93043	1.70046
15	Ebstein anomaly	351	3002199	481	5488088	1.334 (1.1625, 1.5307)	0.2503 (0.1398, 0.3467)	0.1056 (0.0522, 0.156)	16.9642	3.80905e-05	2.00133	1.59705
16	Transposition of great arteries	1190	2767146	1775	5064338	1.227 (1.1401, 1.3205)	0.1849 (0.1228, 0.2426)	0.0742 (0.0465, 0.1011)	29.902	4.54435e-08	1.75449	1.5396
17	Interrupted aortic arch	158	1838212	214	3427481	1.3766 (1.1208, 1.6909)	0.2736 (0.1078, 0.4086)	0.1162 (0.0356, 0.1901)	9.36573	0.0022108	2.09665	1.48879
18	Coarctation of the aorta	2265	3139221	3444	5538436	1.1603 (1.1004, 1.2235)	0.1381 (0.0911, 0.1826)	0.0548 (0.0347, 0.0744)	30.2392	3.81906e-08	1.59128	1.43248
19	Cleft palate alone	2079	2970644	3076	5076738	1.1551 (1.0925, 1.2212)	0.1342 (0.0846, 0.181)	0.0541 (0.0326, 0.0751)	25.804	3.77903e-07	1.57797	1.41026
20	Anophthalmia/microphthalmia	994	3140492	1474	5475111	1.1757 (1.0848, 1.2742)	0.1494 (0.0781, 0.2151)	0.0602 (0.0292, 0.0901)	15.5777	7.91843e-05	1.62998	1.38798
21	Cleft lip alone	891	2259755	1224	3657135	1.1781 (1.0806, 1.2843)	0.1511 (0.0746, 0.2213)	0.0637 (0.029, 0.0971)	13.8758	0.000195301	1.63594	1.37577
22	Patent ductus arteriosus	2584	645681	5802	1638554	1.1302 (1.0789, 1.1839)	0.1148 (0.0729, 0.1548)	0.0354 (0.0215, 0.049)	26.7141	2.35895e-07	1.51245	1.3698
23	Diaphragmatic hernia	853	2941453	1345	5346993	1.1529 (1.0581, 1.2561)	0.1326 (0.0549, 0.2039)	0.0514 (0.0193, 0.0825)	10.5756	0.0011459	1.57253	1.30588
24	Amniotic Bands	44	481368	96	1566165	1.4912 (1.0437, 2.1307)	0.3294 (0.0419, 0.5306)	0.1035 (-0.0029, 0.1986)	4.88168	0.0271431	2.347	1.25721
25	Hypoplastic left heart syndrome	1403	3370820	2065	5539815	1.1166 (1.0434, 1.195)	0.1044 (0.0416, 0.1631)	0.0422 (0.0156, 0.0681)	10.1676	0.00142929	1.47729	1.25606
26	Trisomy 18	4380	3277148	6975	5521935	1.0581 (1.0188, 1.0989)	0.0548 (0.0185, 0.0899)	0.0212 (0.0068, 0.0353)	8.57102	0.00341556	1.30578	1.15725
27	Craniosynostosis	580	1329495	1074	2759701	1.121 (1.0133, 1.2401)	0.1079 (0.0131, 0.1936)	0.0378 (0.0032, 0.0713)	4.91546	0.0266174	1.48911	1.12924
28	Double outlet right ventricle	601	1925342	1070	3825085	1.1159 (1.0098, 1.2332)	0.1038 (0.0097, 0.189)	0.0373 (0.0021, 0.0713)	4.63092	0.0314007	1.47542	1.10915
29	Atrioventricular septal defect	1711	2847797	3106	5525804	1.0689 (1.0076, 1.1339)	0.0644 (0.0076, 0.118)	0.0229 (0.0022, 0.0431)	4.8962	0.0269159	1.34014	1.09528
30	Omphalocele	1495	2893036	2500	5196269	1.0741 (1.0074, 1.1452)	0.0689 (0.0073, 0.1267)	0.0258 (0.0022, 0.0489)	4.77833	0.02882	1.35606	1.09373
31	Limb deficiencies (reduction defects)	1431	2165819	2254	3656105	1.0717 (1.003, 1.1452)	0.0669 (0.003, 0.1267)	0.026 (6e-04, 0.0507)	4.19857	0.0404581	1.34882	1.05786
32	Rectal and large intestinal atresia/stenosis	1036	2503411	2040	5313456	1.0779 (1.0002, 1.1616)	0.0722 (2e-04, 0.1391)	0.0243 (-5e-04, 0.0486)	3.86562	0.049285	1.36755	1.01497
33	Small intestinal atresia/stenosis	633	1526856	1318	3462461	1.0891 (0.9906, 1.1974)	0.0818 (-0.0095, 0.1648)	0.0265 (-0.0039, 0.056)	3.11707	0.077476	1.40056	1
34	Microcephalus	442	753640	1007	1882514	1.0964 (0.9804, 1.2262)	0.0879 (-0.02, 0.1844)	0.0268 (-0.007, 0.0594)	2.60182	0.106741	1.42133	1
35	Encephalocele	762	3115976	1203	5294326	1.0762 (0.9829, 1.1785)	0.0708 (-0.0174, 0.1514)	0.0275 (-0.0074, 0.0611)	2.5184	0.112525	1.36261	1
36	Congenital cataract	488	3140998	781	5475804	1.0893 (0.9728, 1.2197)	0.082 (-0.0279, 0.1801)	0.0315 (-0.0115, 0.0727)	2.19854	0.138141	1.40116	1
37	Trisomy 21 (Down syndrome)	12953	3359270	20947	5520933	1.0163 (0.9942, 1.0388)	0.016 (-0.0058, 0.0372)	0.0061 (-0.0022, 0.0144)	2.08096	0.149147	1.14463	1
38	Tetralogy of Fallot	1859	3370364	2842	5325624	1.0336 (0.9749, 1.0958)	0.0325 (-0.0258, 0.0874)	0.0128 (-0.0102, 0.0354)	1.22629	0.268131	1.21985	1
39	Clubfoot	1445	1026242	4685	3437583	1.0331 (0.9739, 1.096)	0.032 (-0.0267, 0.0874)	0.0076 (-0.0063, 0.0212)	1.17276	0.278835	1.21802	1
40	Bladder exstrophy	65	2387858	128	5470517	1.1634 (0.8631, 1.5681)	0.1404 (-0.1586, 0.3623)	0.0473 (-0.0535, 0.1384)	0.989129	0.319955	1.59935	1
41	Single ventricle	306	1965042	524	3592734	1.0677 (0.9273, 1.2294)	0.0634 (-0.0784, 0.1866)	0.0234 (-0.0287, 0.0728)	0.828814	0.362616	1.33648	1
42	Esophageal atresia/tracheoesophageal fistula	741	3140745	1253	5527657	1.0408 (0.9504, 1.1398)	0.0392 (-0.0521, 0.1226)	0.0146 (-0.0193, 0.0473)	0.745263	0.38798	1.24691	1
43	Congenital posterior urethral valves	277	1527212	604	3539254	1.0628 (0.9219, 1.2253)	0.0591 (-0.0847, 0.1838)	0.0186 (-0.0263, 0.0615)	0.704778	0.401183	1.32114	1
44	Pulmonary valve atresia and stenosis	2469	2566634	5238	5536642	1.0168 (0.9693, 1.0667)	0.0165 (-0.0317, 0.0624)	0.0053 (-0.0101, 0.0204)	0.465667	0.494987	1.14745	1
45	Hirschsprung disease (congenital megacolon)	193	953069	359	1883162	1.0622 (0.8917, 1.2653)	0.0586 (-0.1214, 0.2097)	0.0205 (-0.0413, 0.0786)	0.457784	0.498661	1.31935	1
46	Reduction deformity, Lower limbs	206	981891	379	1883142	1.0424 (0.8797, 1.2352)	0.0407 (-0.1367, 0.1904)	0.0143 (-0.0463, 0.0715)	0.230464	0.63118	1.25272	1
47	Reduction deformity, Upper limbs	388	981709	727	1882794	1.0236 (0.9049, 1.1578)	0.023 (-0.1051, 0.1363)	0.008 (-0.0354, 0.0496)	0.137248	0.711033	1.17885	1
48	Turner syndrome	1463	1664962	2877	3307541	1.0102 (0.9486, 1.0758)	0.0101 (-0.0542, 0.0704)	0.0034 (-0.018, 0.0243)	0.0997046	0.752184	1.11163	1
49	Common truncus (truncus arteriosus)	236	3199859	401	5532478	1.0176 (0.8664, 1.1951)	0.0172 (-0.1542, 0.1632)	0.0064 (-0.0546, 0.0639)	0.0449746	0.832051	1.15119	1
50	Hypospadias	16139	2580109	35051	5489818	0.9797 (0.9616, 0.9982)	-0.0206 (-0.0397, -0.0018)	-0.0065 (-0.0124, -6e-04)	4.61608	0.0316736	1.16552	NA
51	Dextro-transposition of great arteries (d-TGA)	559	2254643	1013	3937246	0.9636 (0.8691, 1.0685)	-0.0377 (-0.1506, 0.0641)	-0.0134 (-0.0513, 0.0231)	0.493933	0.482178	1.23555	NA
52	Renal agenesis/hypoplasia	1853	2574008	4191	5524719	0.949 (0.8985, 1.0023)	-0.0537 (-0.1129, 0.0023)	-0.0165 (-0.0336, 4e-04)	3.52157	0.060575	1.29164	NA
53	Congenital hip dislocation	429	753653	1106	1843104	0.9486 (0.8485, 1.0605)	-0.0542 (-0.1784, 0.057)	-0.0151 (-0.0473, 0.016)	0.860583	0.353576	1.2931	NA
54	Obstructive genitourinary defect	1940	752142	5324	1851263	0.8969 (0.8514, 0.9448)	-0.1147 (-0.174, -0.0583)	-0.0306 (-0.045, -0.0164)	16.8152	4.12009e-05	1.47214	NA
55	Biliary atresia	194	3030944	397	5476188	0.8829 (0.7436, 1.0483)	-0.1326 (-0.3448, 0.0461)	-0.0435 (-0.104, 0.0136)	2.02384	0.154847	1.52019	NA
56	Hydrocephalus without spina bifida	748	753334	2145	1881376	0.8709 (0.8013, 0.9465)	-0.1481 (-0.2477, -0.0564)	-0.0383 (-0.0609, -0.0162)	10.6048	0.00112796	1.56041	NA
57	Trisomy 13	2264	3279264	4253	5287429	0.8583 (0.8156, 0.9032)	-0.1649 (-0.2259, -0.107)	-0.0573 (-0.0762, -0.0387)	34.5282	4.20126e-09	1.60327	NA
58	Holoprosencephaly	1633	2009853	3301	3448494	0.8488 (0.7999, 0.9007)	-0.178 (-0.2499, -0.1102)	-0.0589 (-0.0799, -0.0383)	29.4001	5.88738e-08	1.63582	NA
59	Ventricular septal defect	11062	2493385	28777	5500133	0.848 (0.8295, 0.8668)	-0.1784 (-0.2044, -0.1529)	-0.0495 (-0.0559, -0.0432)	216.832	1.24068e-20	1.63685	NA
60	Choanal atresia	432	3141054	913	5511059	0.8302 (0.7404, 0.9309)	-0.2045 (-0.3506, -0.0743)	-0.0657 (-0.1056, -0.0272)	10.1852	0.00141572	1.70086	NA
61	Epispadias	66	782851	226	1857444	0.6929 (0.5267, 0.9115)	-0.4432 (-0.8985, -0.097)	-0.1002 (-0.1705, -0.034)	6.95198	0.00837264	2.24286	NA
62	Tricuspid valve atresia and stenosis	545	2941761	1649	5462136	0.6137 (0.557, 0.6761)	-0.6294 (-0.795, -0.479)	-0.1563 (-0.1845, -0.1289)	99.6049	4.00904e-159	2.64202	NA

[truncated: 17 more sheets: ST10 Coc Q15, ST11 Cont, ST12 Cat, ST13 SISA lme, ST14 SISA SG, ST15 SISA plm, ST16 SISA EVals List, ST17 SISA Ratios, ST18 SISA Mods, T19 SISA Mod EValsS, ST20 OGUD lme, ST21 OGUD SG, ST22 OGUD plm, ST23 OGUD EVal List, ST24 OGUD Ratios, ST25 OGUD Reg, ST26 OGUD Mod EVals]
